# Supplementary material for: One-pot four-component synthesis of novel isothiourea-ethylene-tethered-piperazine derivatives
Source: Royal Society of Chemistry journal article supplement (doi:10.1039/d3ra06678a), 2023-01-01

# **One-pot four-component synthesis of novel isothiourea ethylene-tethered piperazine derivatives**

Fatima Hajizadeh, Mohammad M. Mojtahedi,\* M. Saeed Abaee

Organic Chemistry Department, Chemistry and Chemical Engineering Research Center of Iran,

P.O. Box 14335-186, Tehran, Iran, e-mail: [mojtahedi@ccerci.ac.ir](mailto:mojtahedi@ccerci.ac.ir)

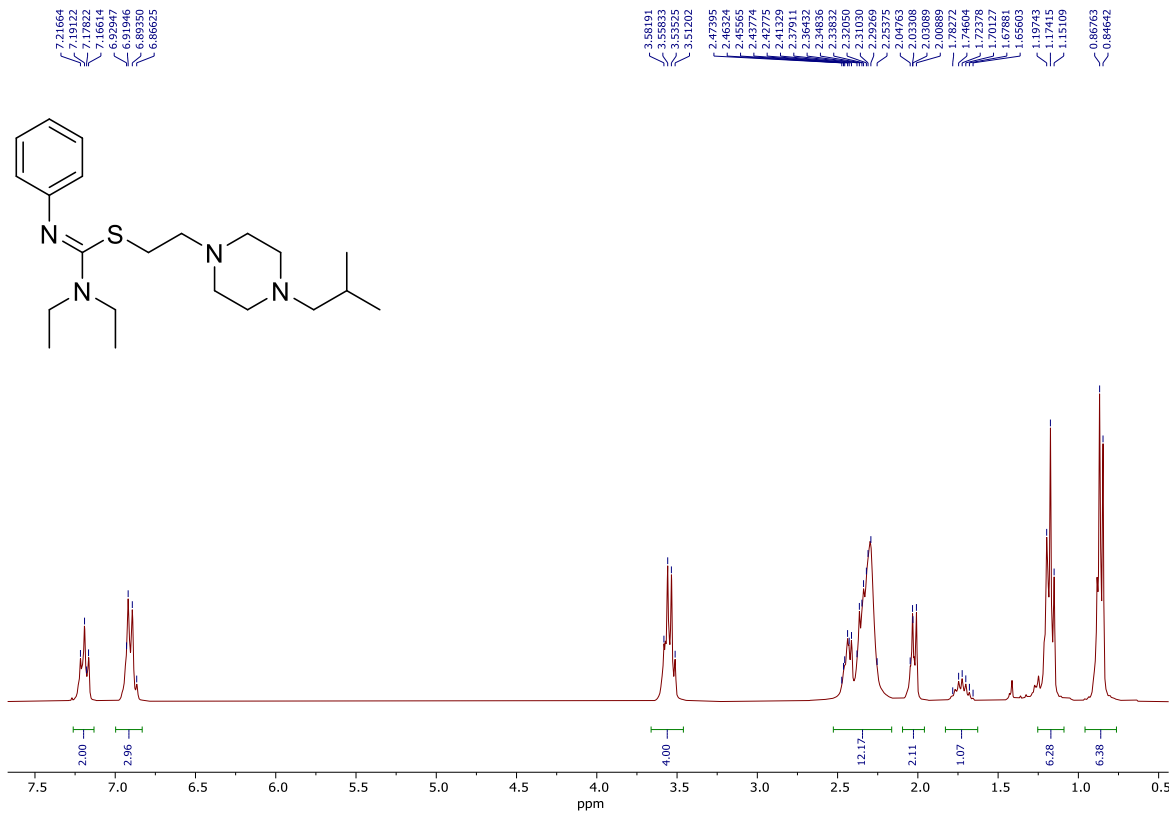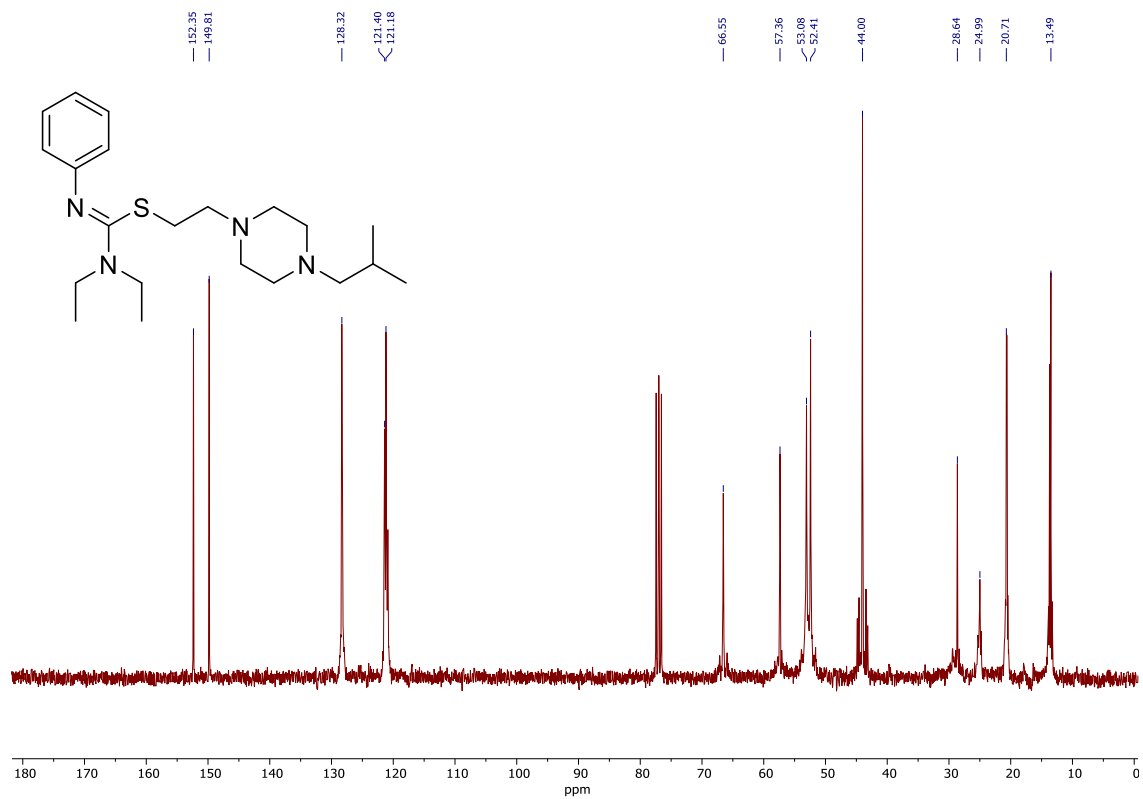

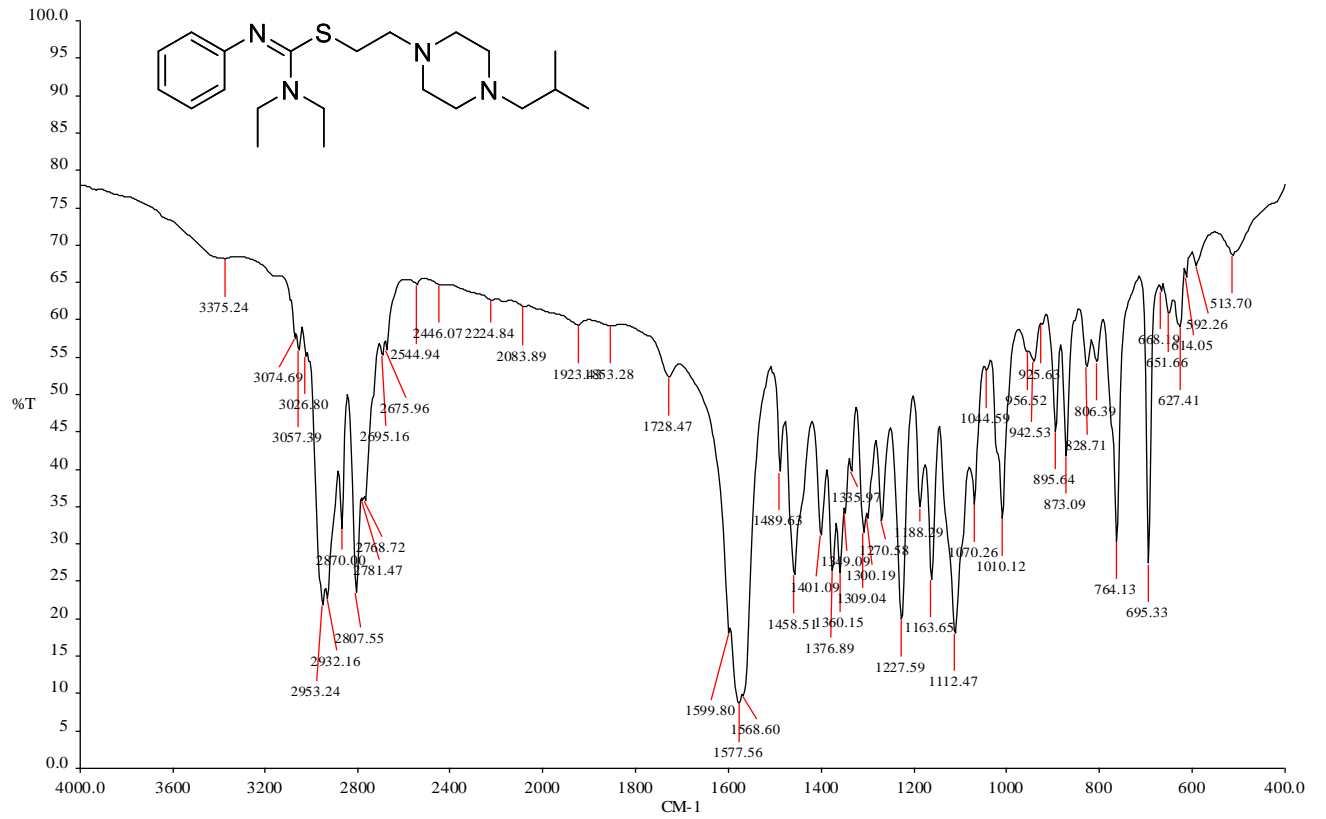

Mr. Moradi

Sample: D 3

Acquired : 3 Jan 2007 7:06 using AcqMethod f1.M  
Instrument : MSD  
Sample Name: D3  
Misc Info :  
Vial Number: 1

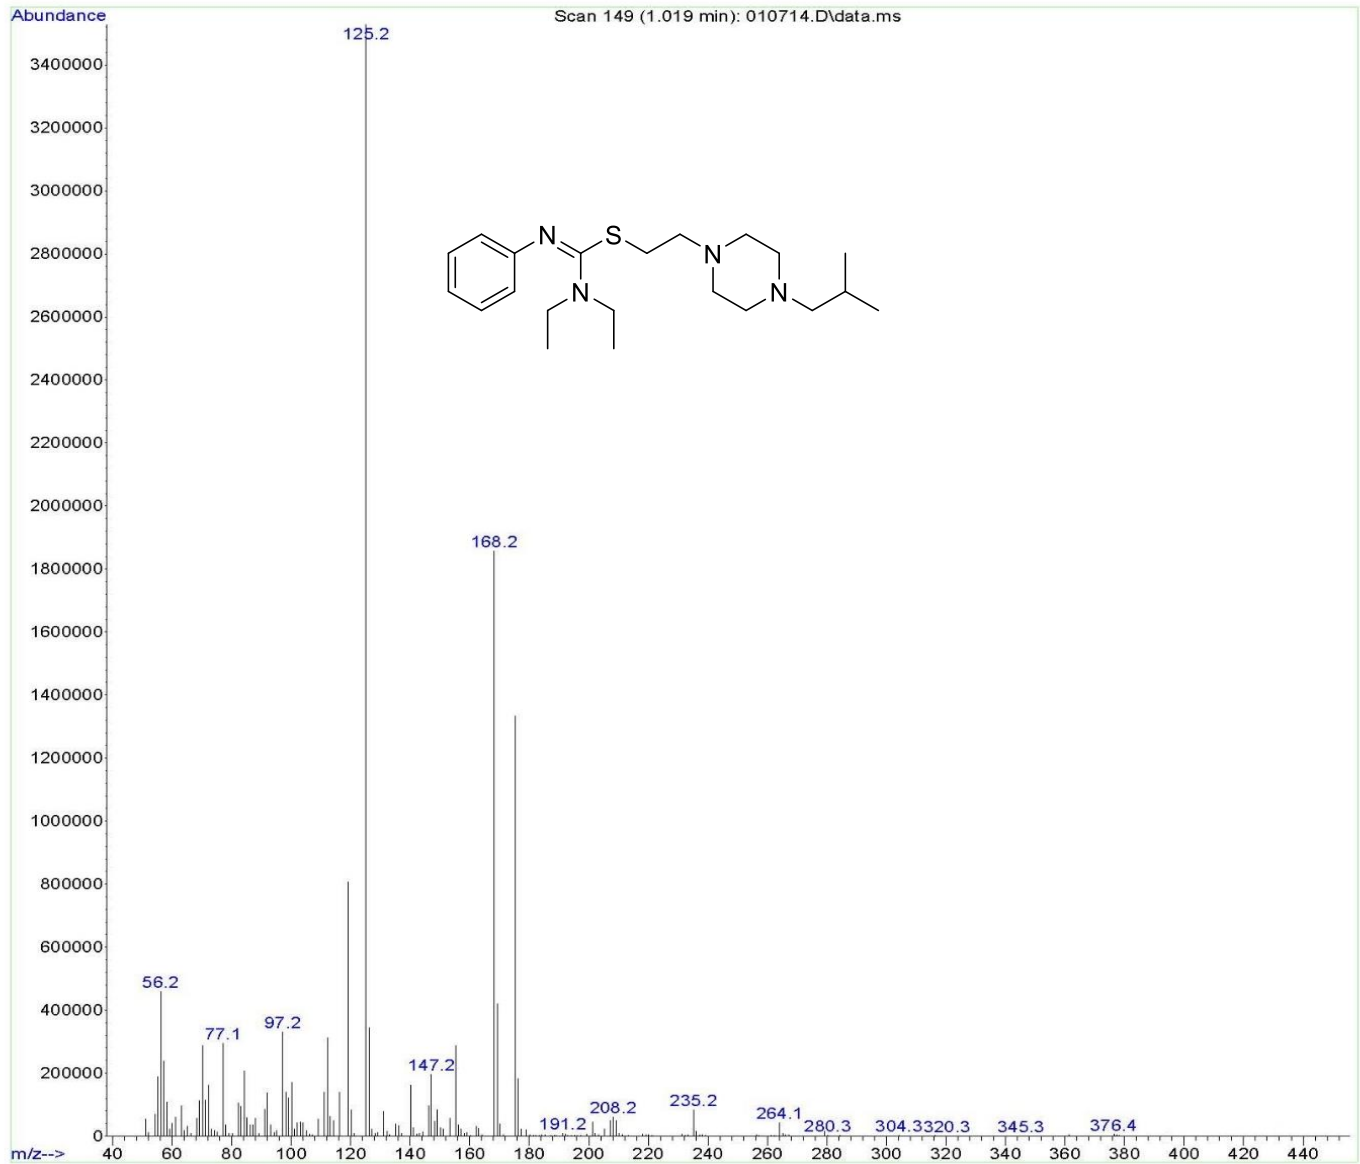

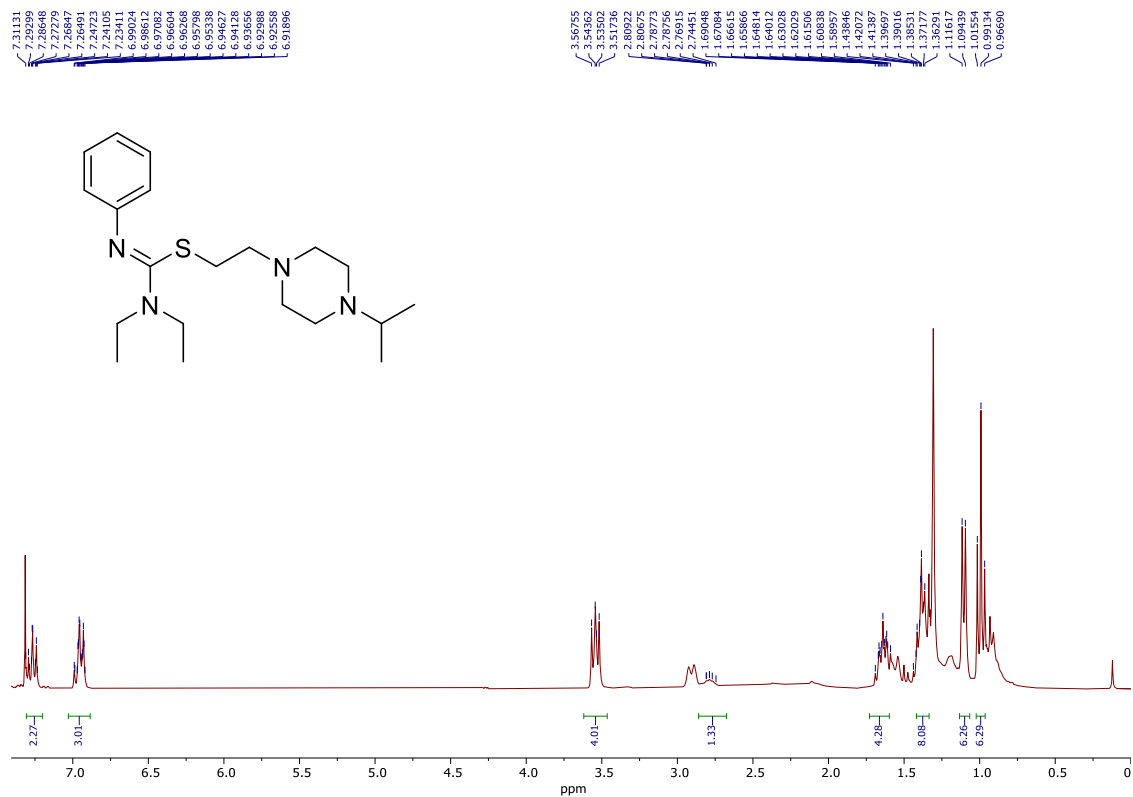

<sup>1</sup>H NMR (300 MHz, CDCl<sub>3</sub>); 2-(4-Isopropylpiperazin-1-yl)ethyl (Z)-N,N-diethyl-N'-phenylcarbamimidothioate **3b**

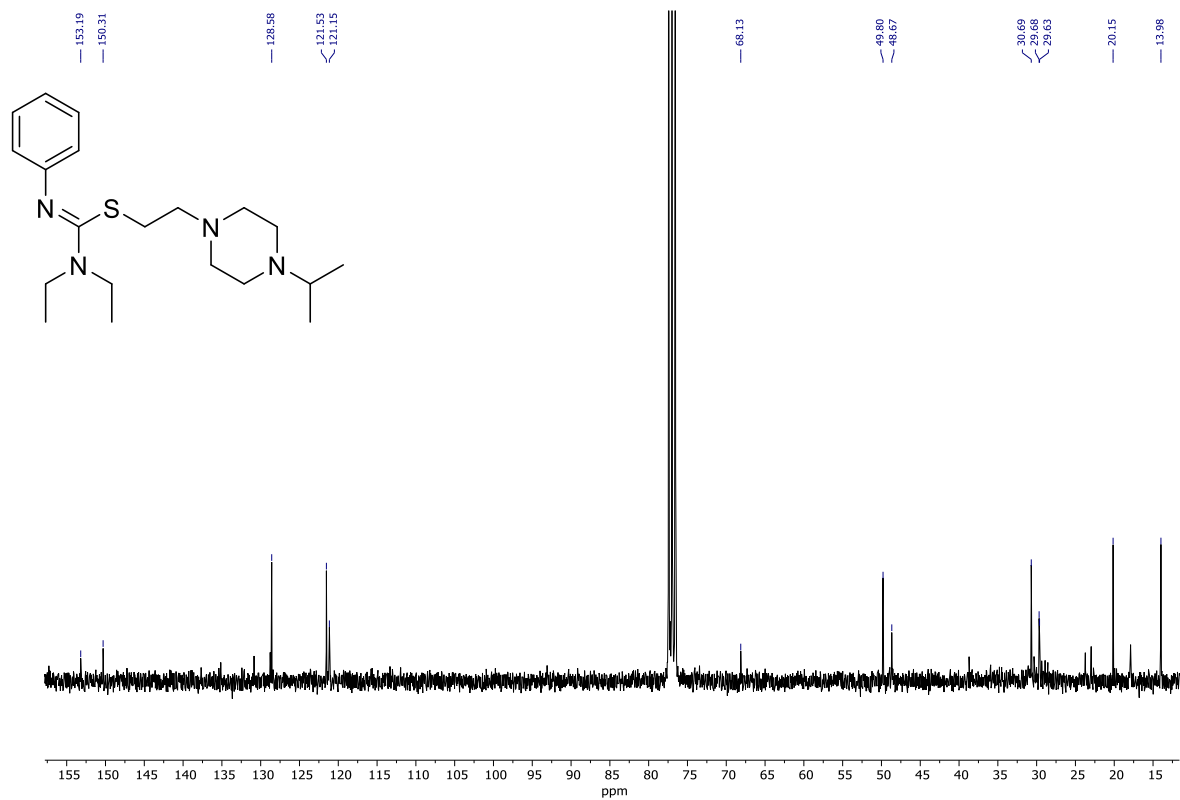

<sup>13</sup>C NMR (75 MHz, CDCl<sub>3</sub>); 2-(4-Isopropylpiperazin-1-yl)ethyl (Z)-N,N-diethyl-N'-phenylcarbamimidothioate **3b**

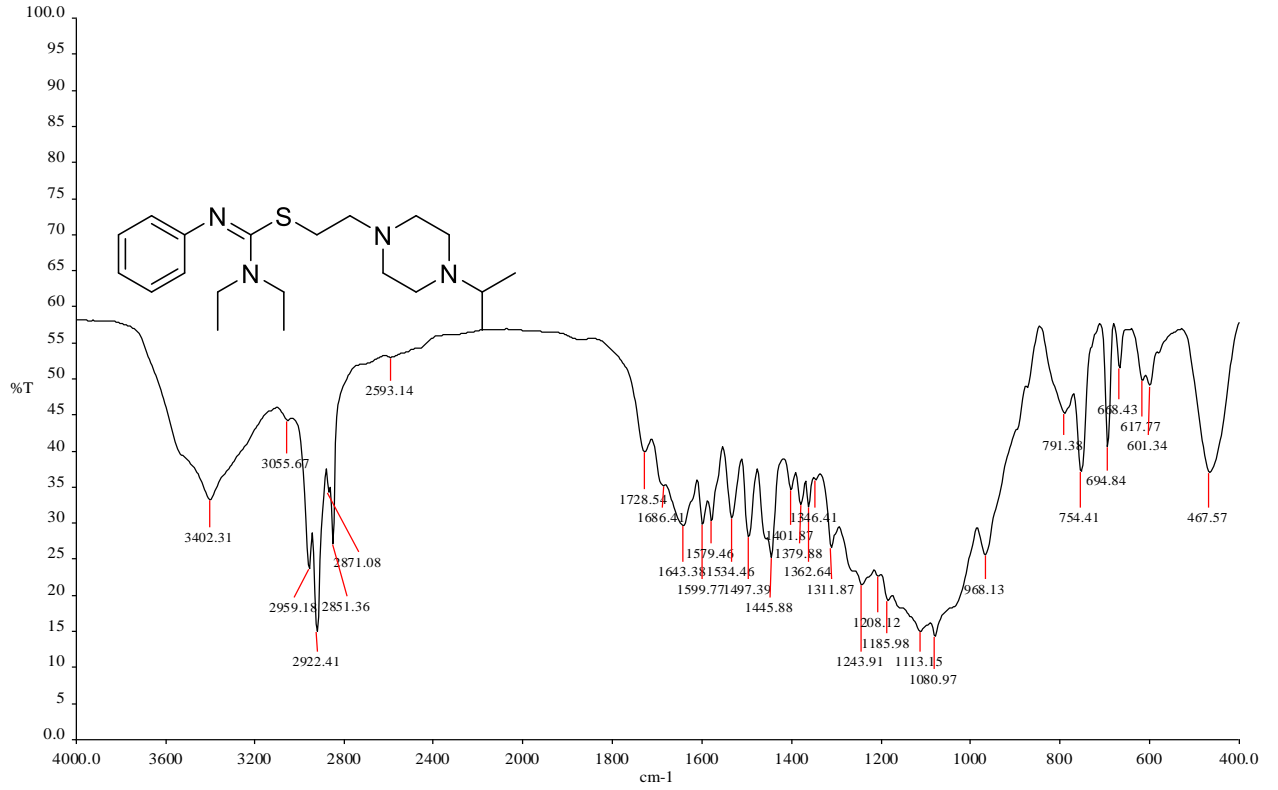

Mr. Moradi

Sample: D5

Acquired : 3 Jan 2007 6:19 using AcqMethod f1.M  
Instrument : MSD  
Sample Name: D5  
Misc Info :  
Vial Number: 1

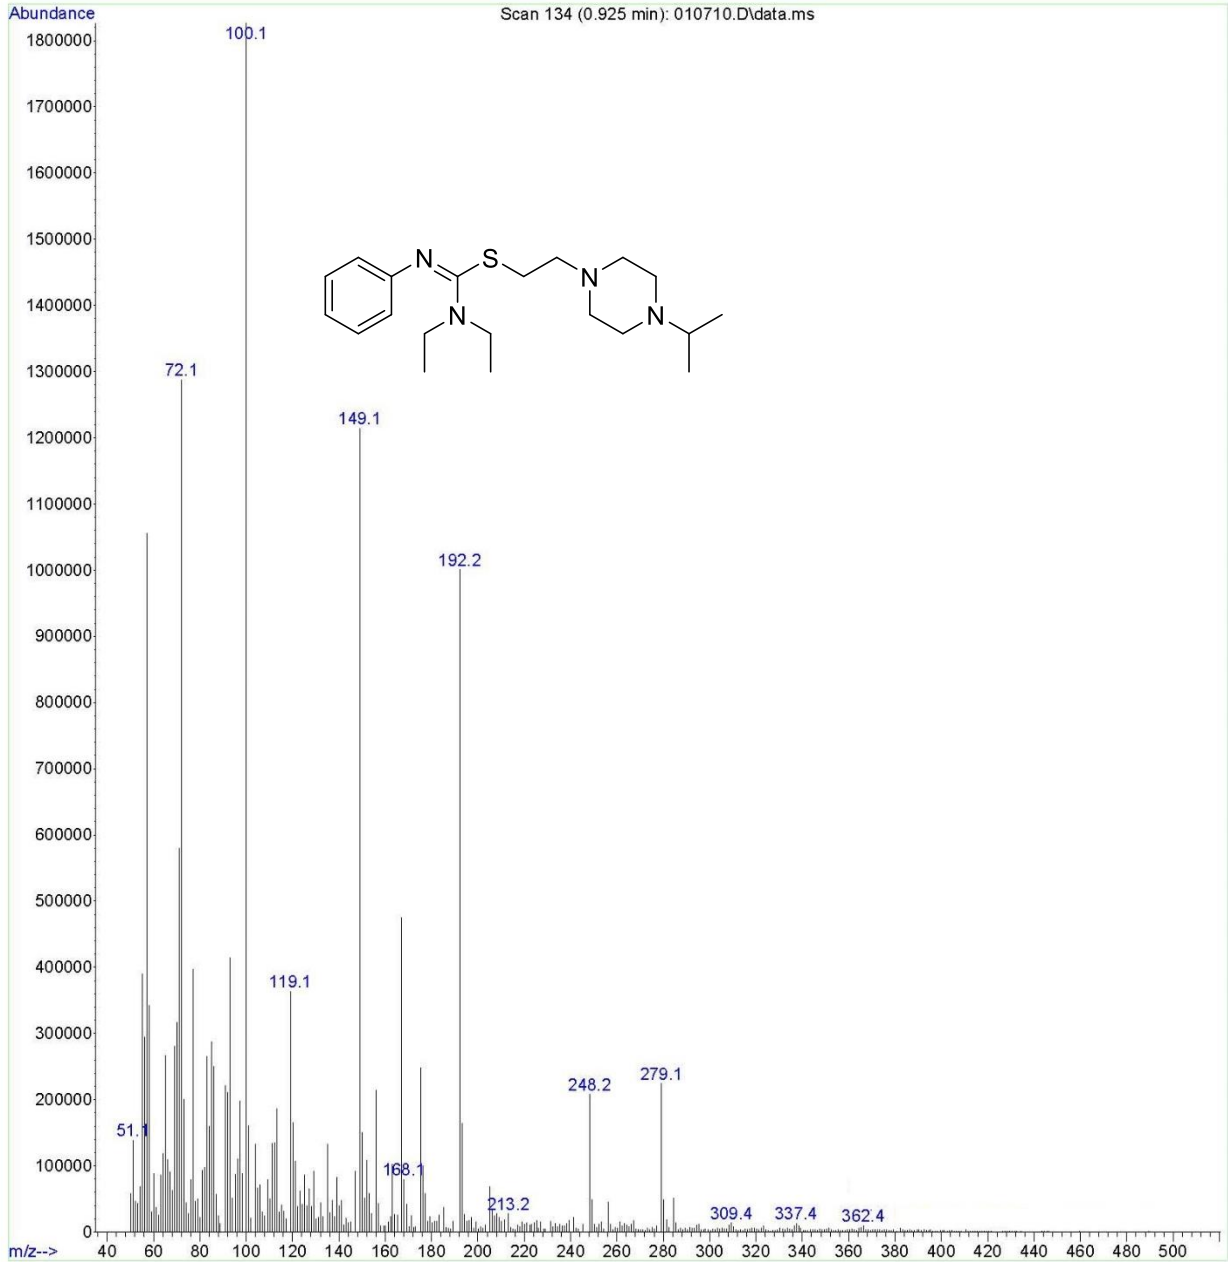

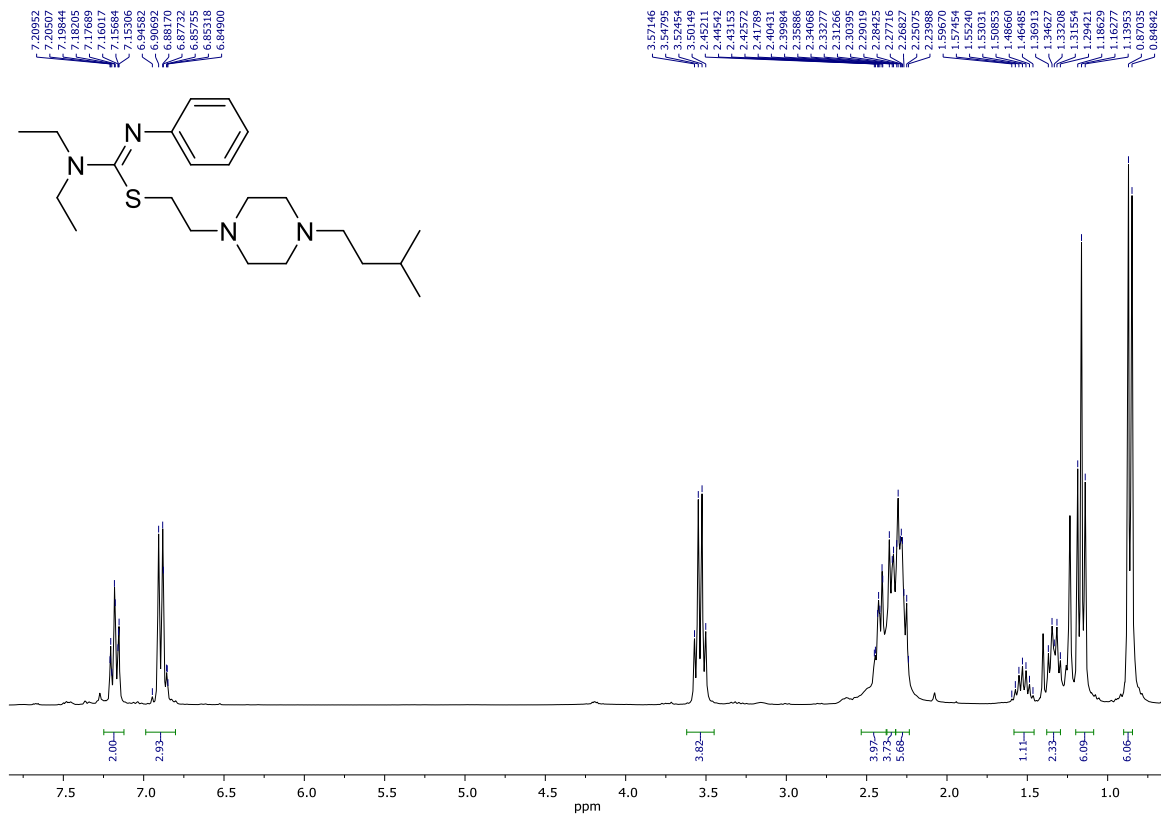

<sup>1</sup>H NMR (300 MHz, CDCl<sub>3</sub>); 2-(4-Isopentylpiperazin-1-yl) ethyl (Z)-N,N-diethyl-N'-phenylcarbamidithioate **3c**

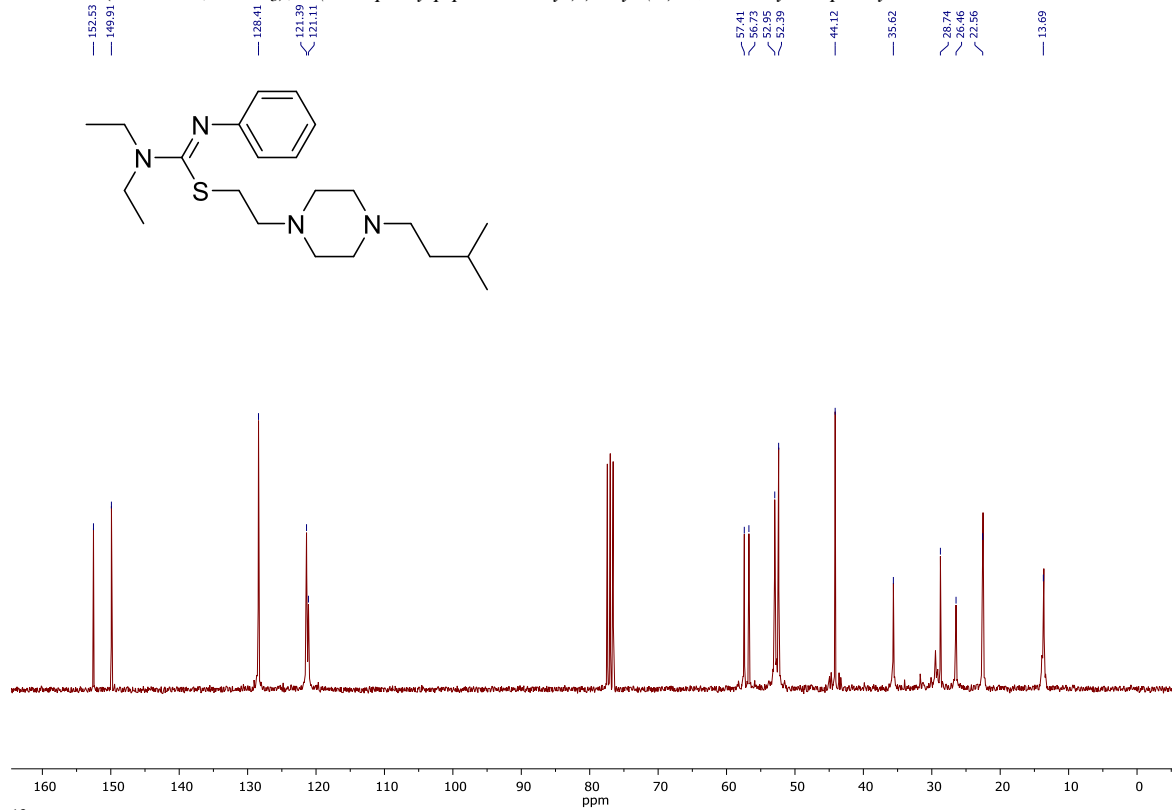

<sup>13</sup>C NMR (75 MHz, CDCl<sub>3</sub>); 2-(4-Isopentylpiperazin-1-yl) ethyl (Z)-N,N-diethyl-N'-phenylcarbamidithioate **3c**



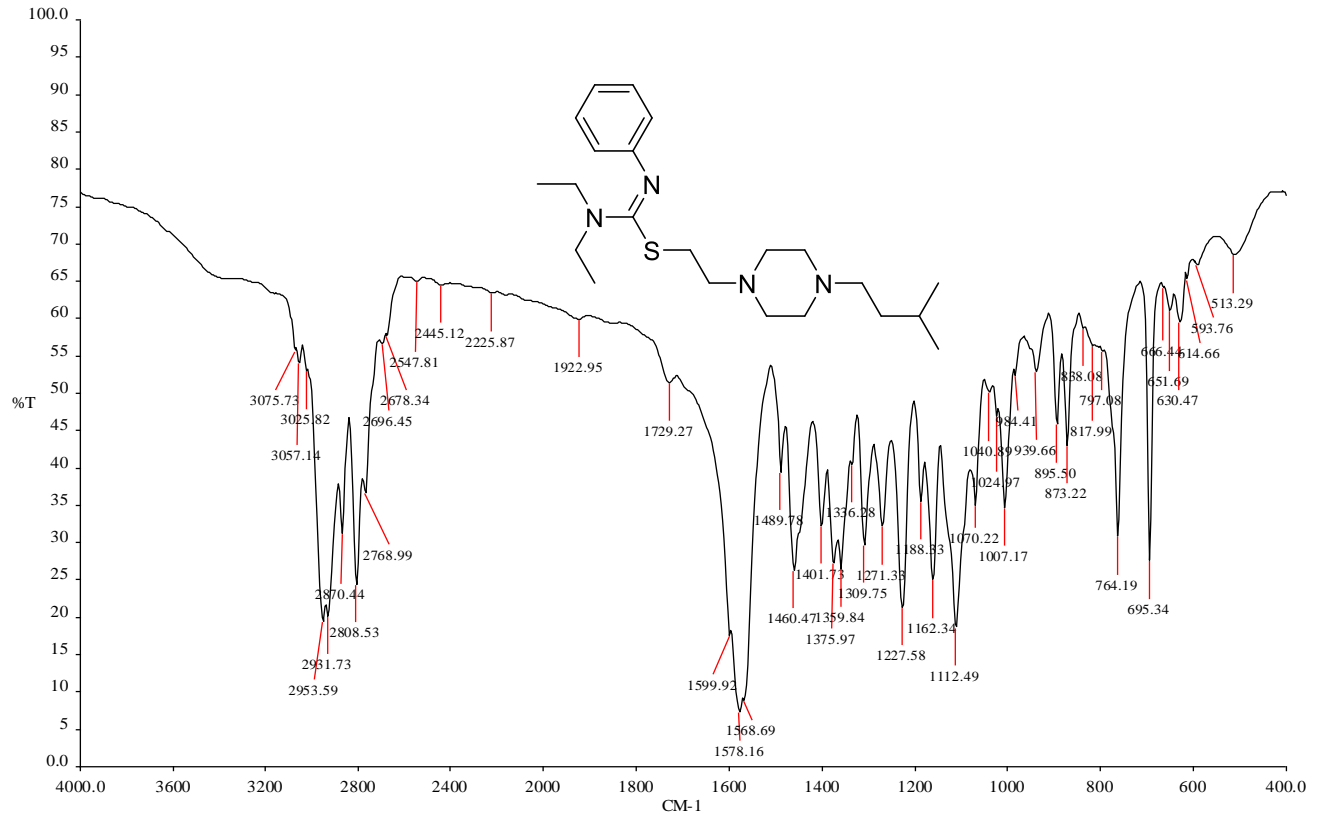

Mr. Moradi

Sample: D 2

Acquired : 3 Jan 2007 6:58 using AcqMethod f1.M  
Instrument : MSD  
Sample Name: D2  
Misc Info :  
Vial Number: 1

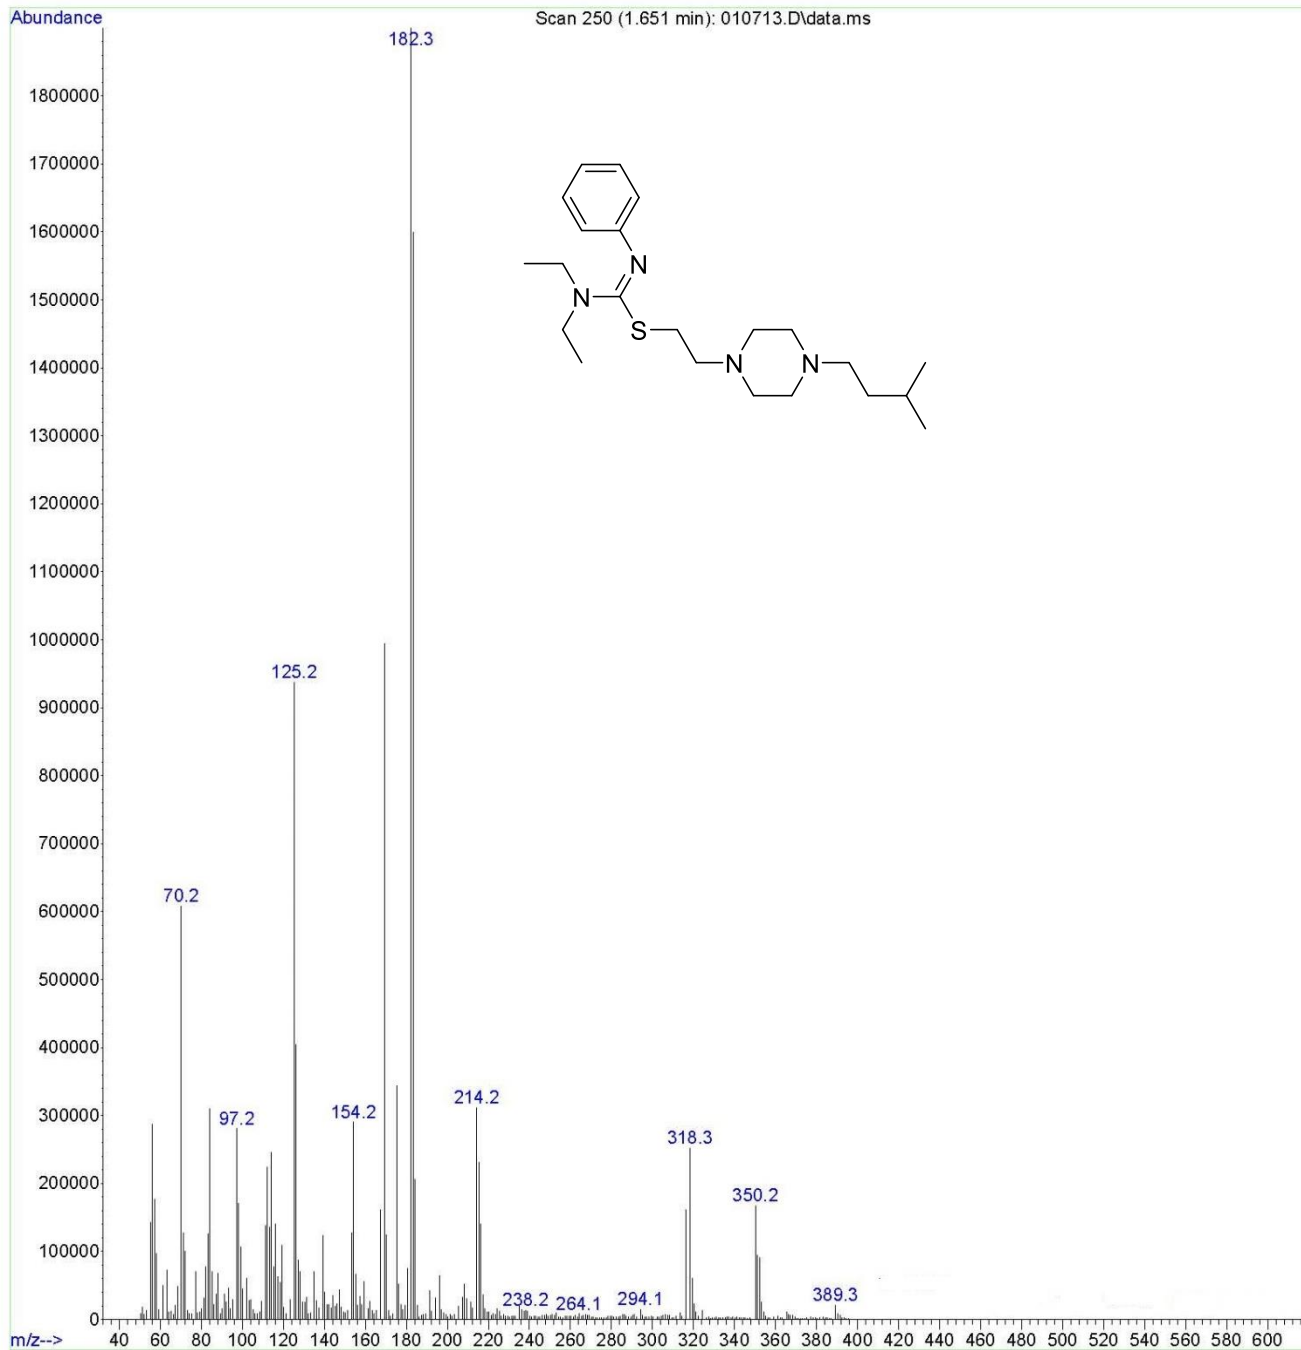

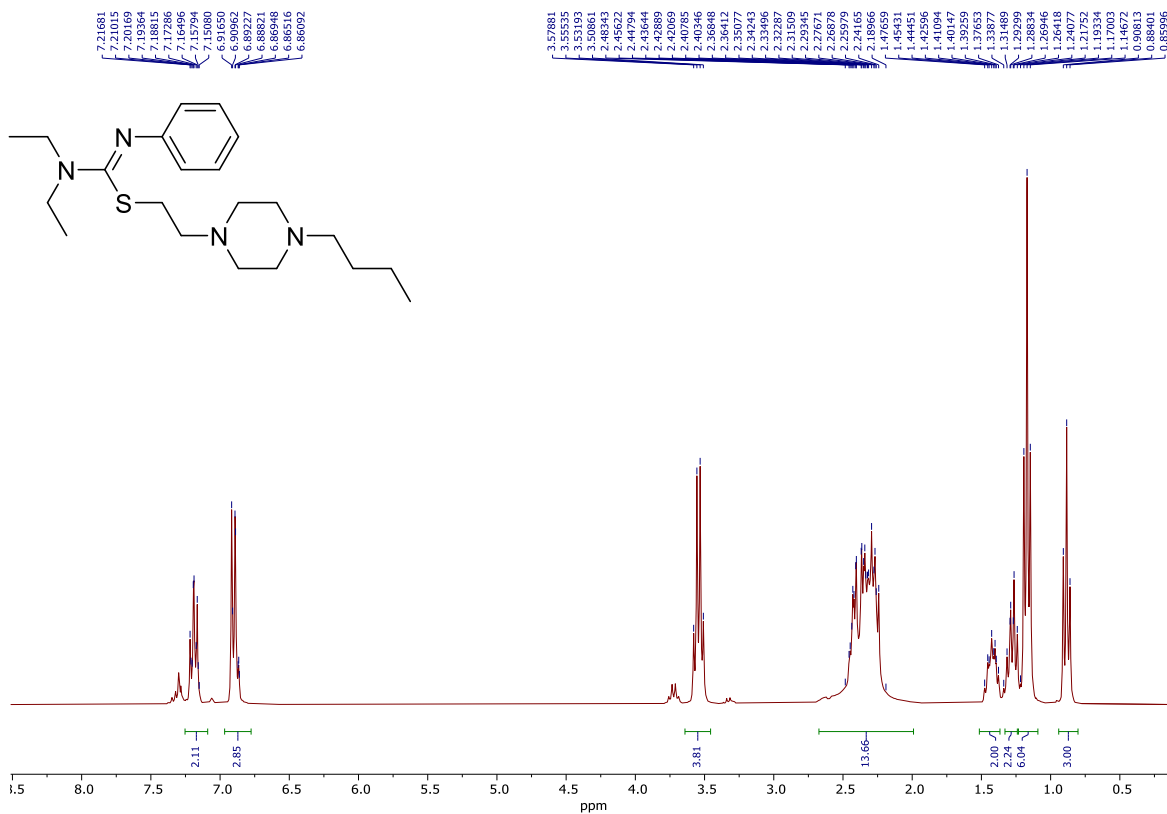

<sup>1</sup>H NMR (300 MHz, CDCl<sub>3</sub>); 2-(4-Butylpiperazin-1-yl) ethyl (Z)-N,N-diethyl-N'-phenylcarbamimidothioate **3d**

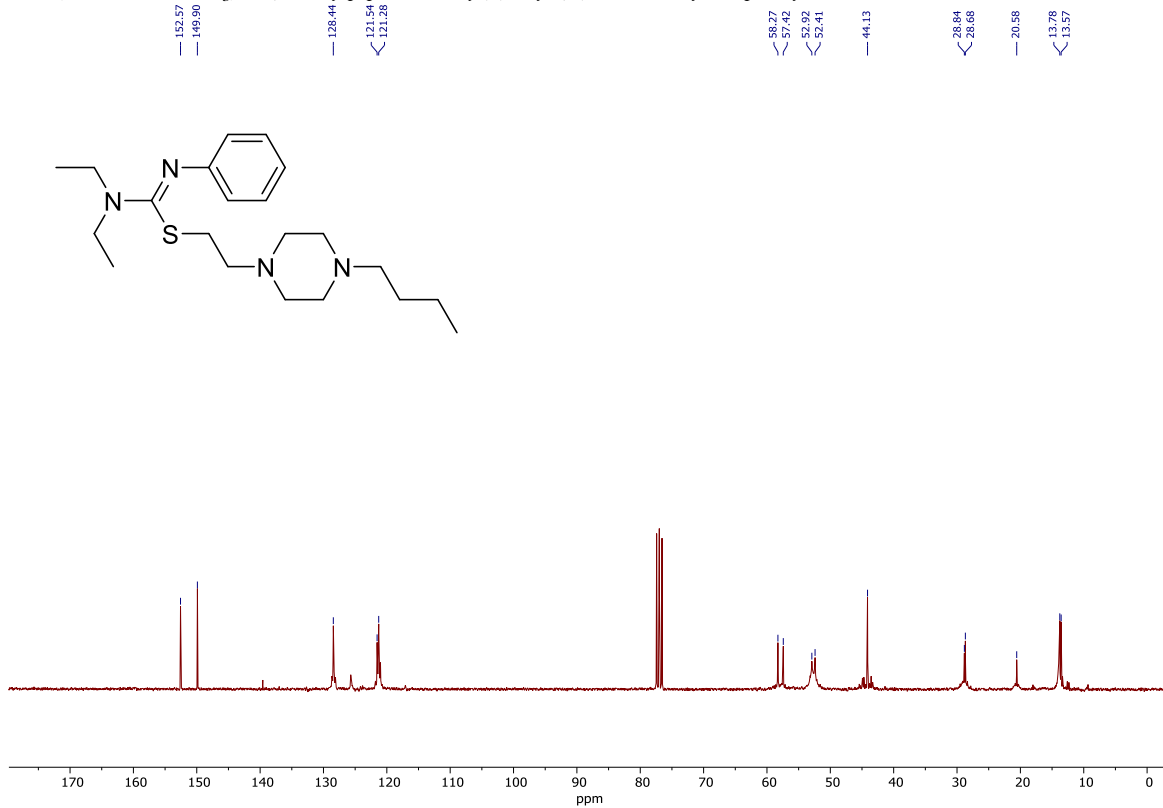

<sup>13</sup>C NMR (75 MHz, CDCl<sub>3</sub>); 2-(4-Butylpiperazin-1-yl) ethyl (Z)-N,N-diethyl-N'-phenylcarbamimidothioate **3d**

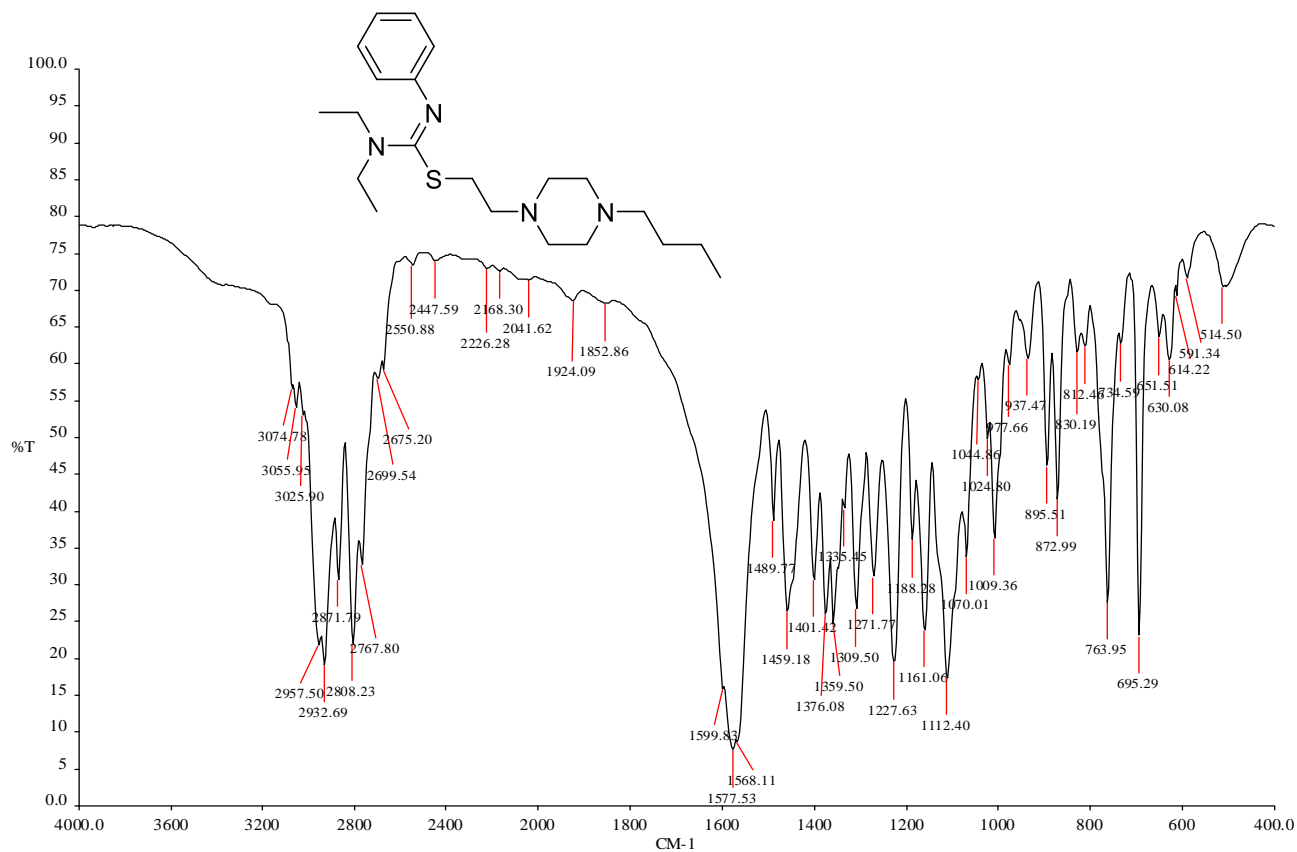

Mr. Moradi

Sample: D 14

Acquired : 3 Jan 2007 7:34 using AcqMethod f1.M  
Instrument : MSD  
Sample Name: D14  
Misc Info :  
Vial Number: 1

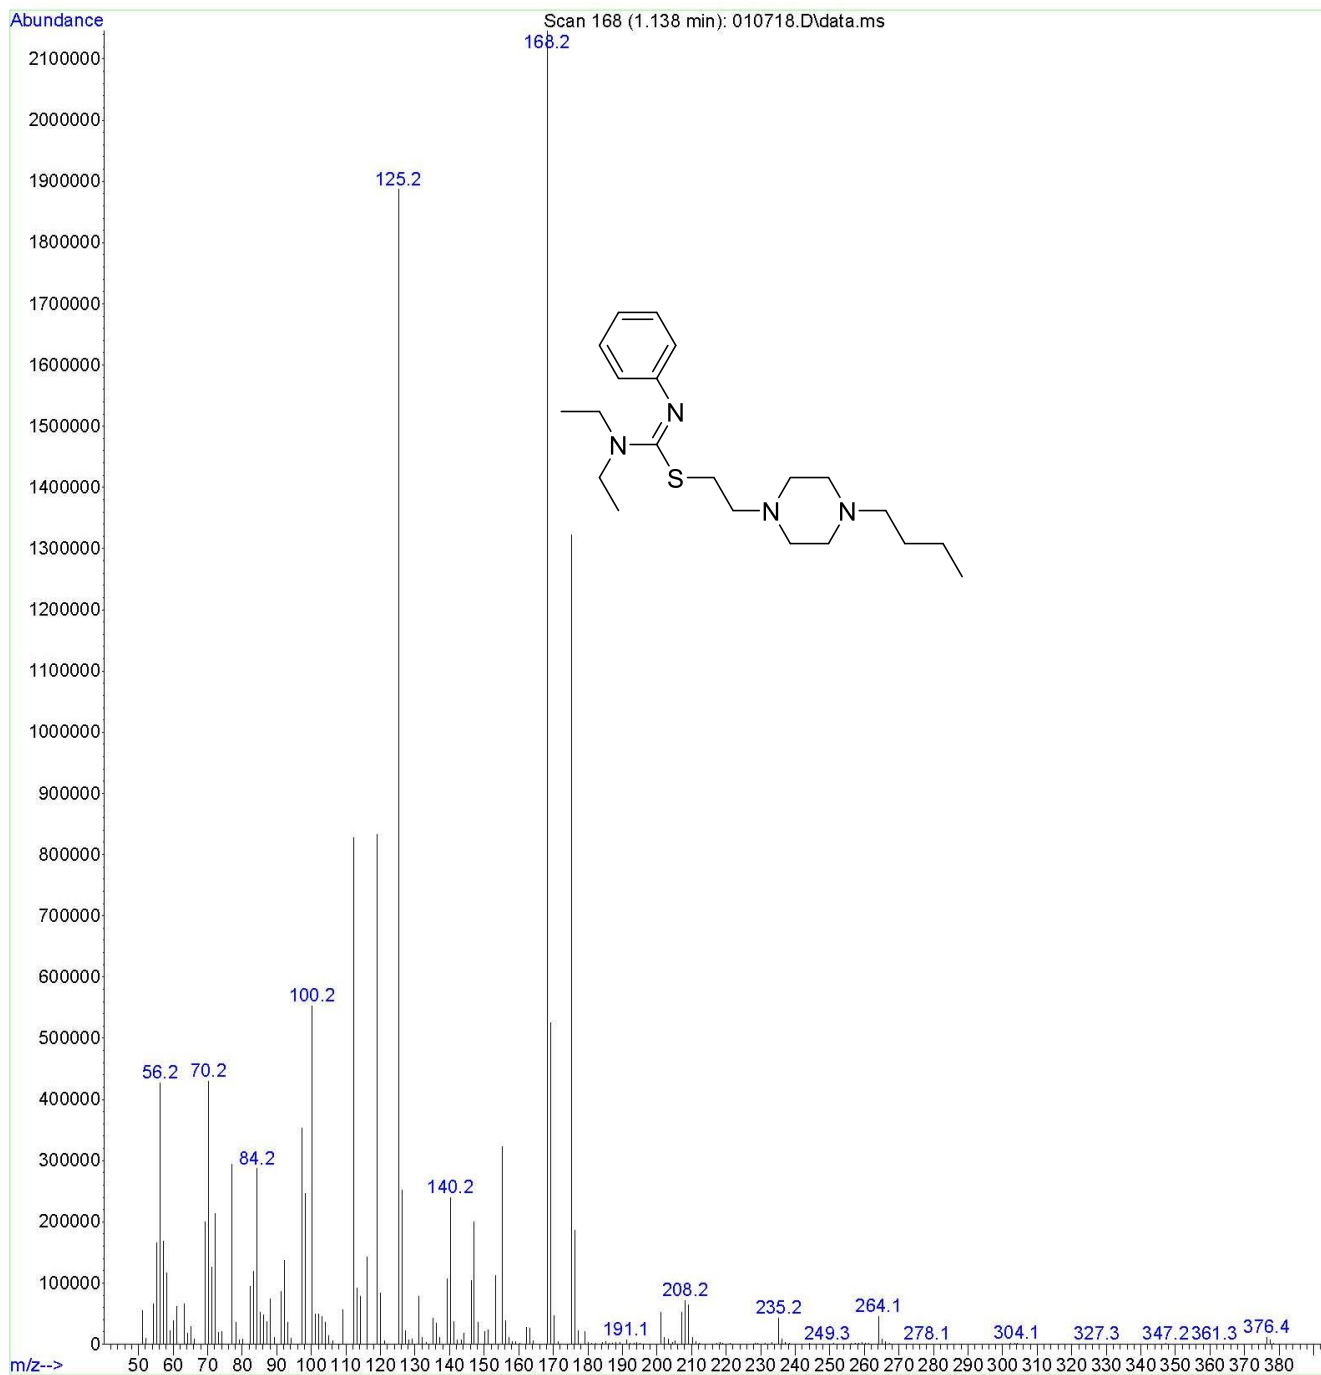

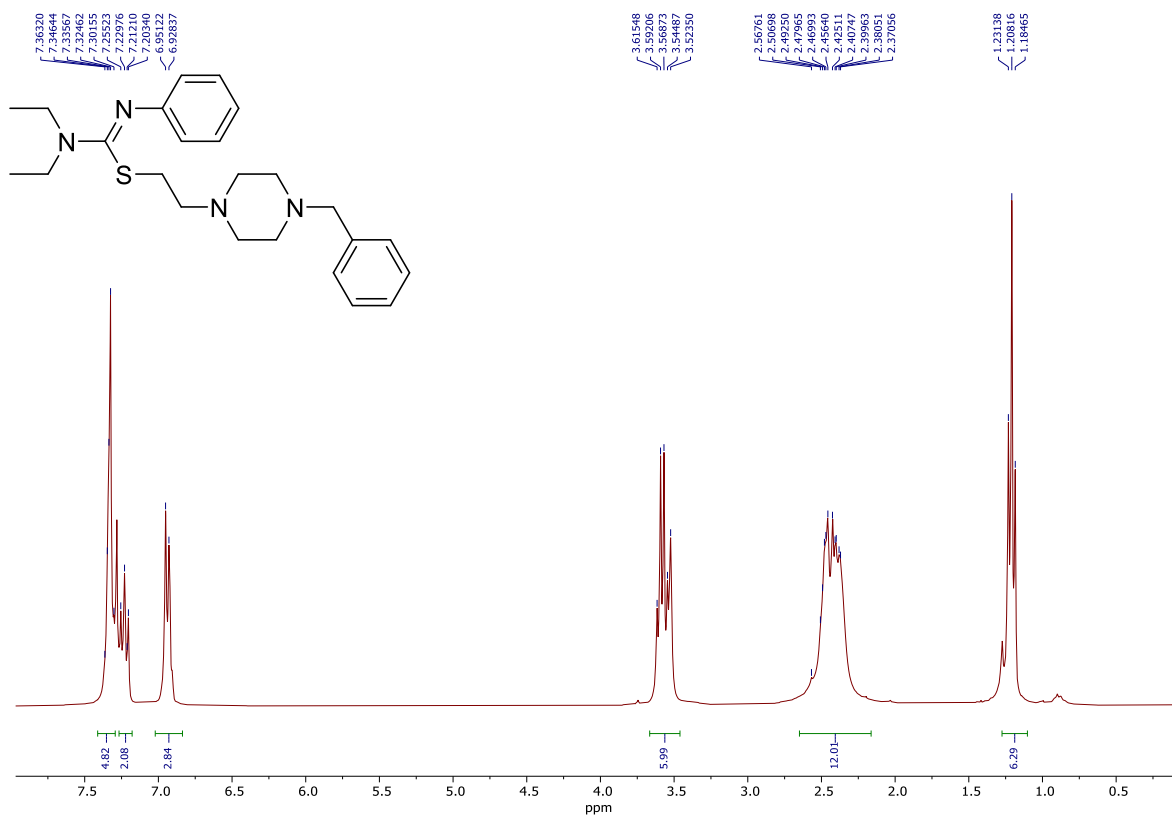

**<sup>1</sup>H NMR (300 MHz, CDCl<sub>3</sub>); 2-(4-Benzylpiperazin-1-yl) ethyl (Z)-N,N-diethyl-N'-phenylcarbamimidothioate **3e****

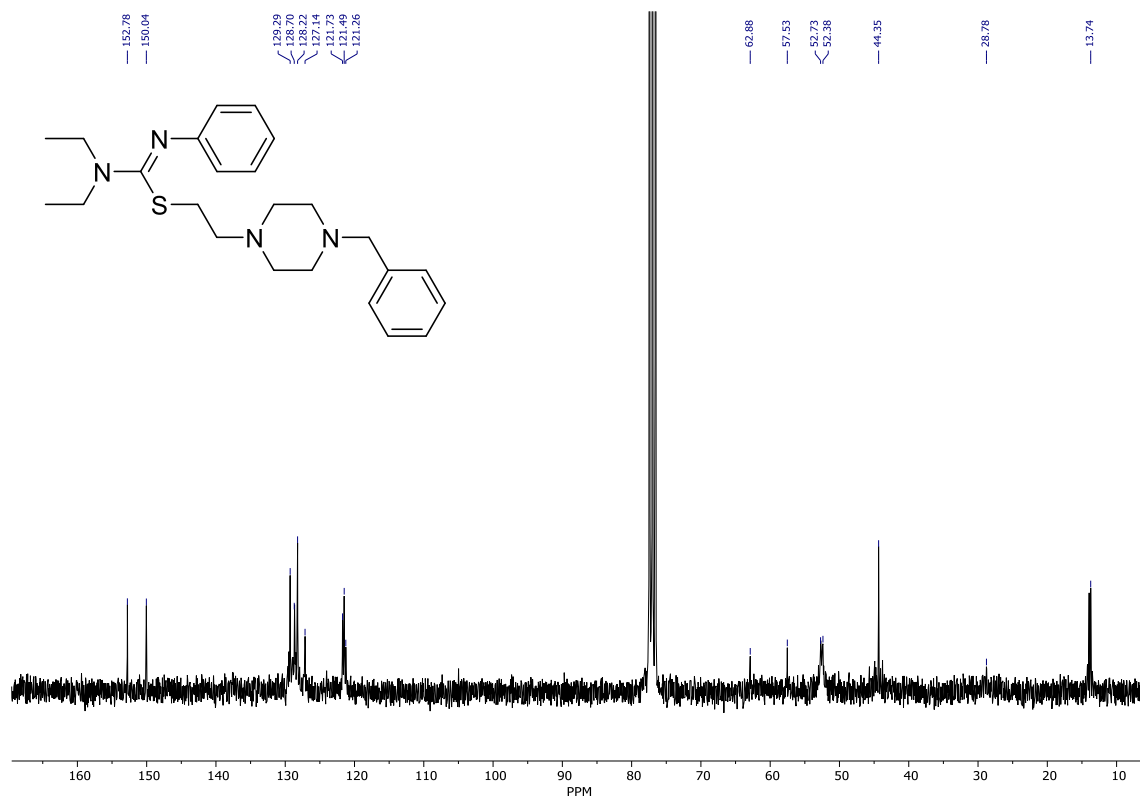

**<sup>13</sup>C NMR (75 MHz, CDCl<sub>3</sub>); 2-(4-Benzylpiperazin-1-yl) ethyl (Z)-N,N-diethyl-N'-phenylcarbamimidothioate **3e****

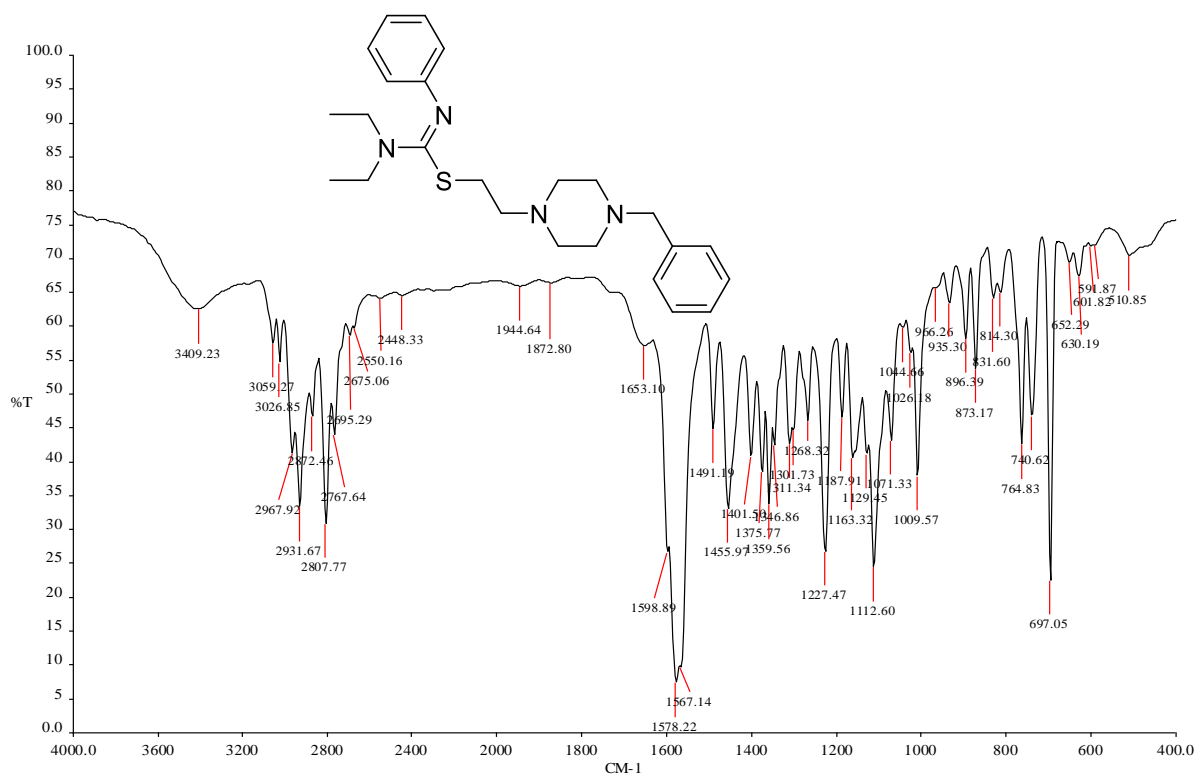

Acquired : 3 Jan 2007 6:43 using AcqMethod f1.M  
Instrument : MSD  
Sample Name: D10  
Misc Info :  
Vial Number: 1

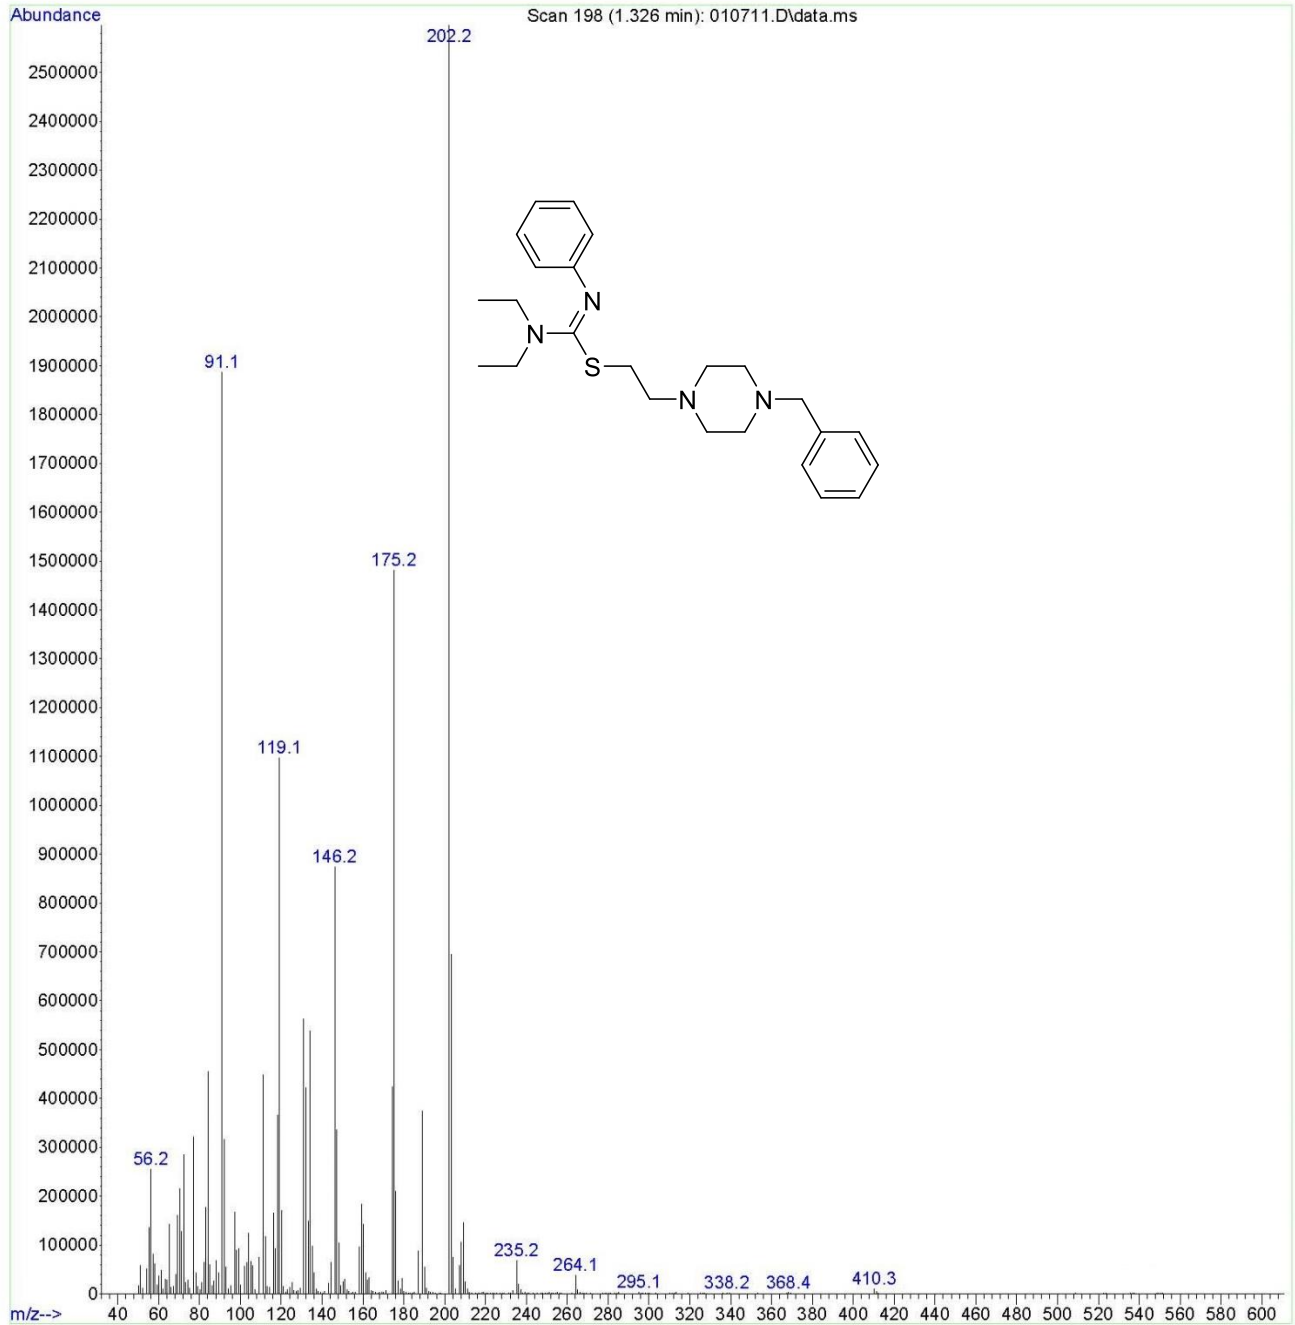



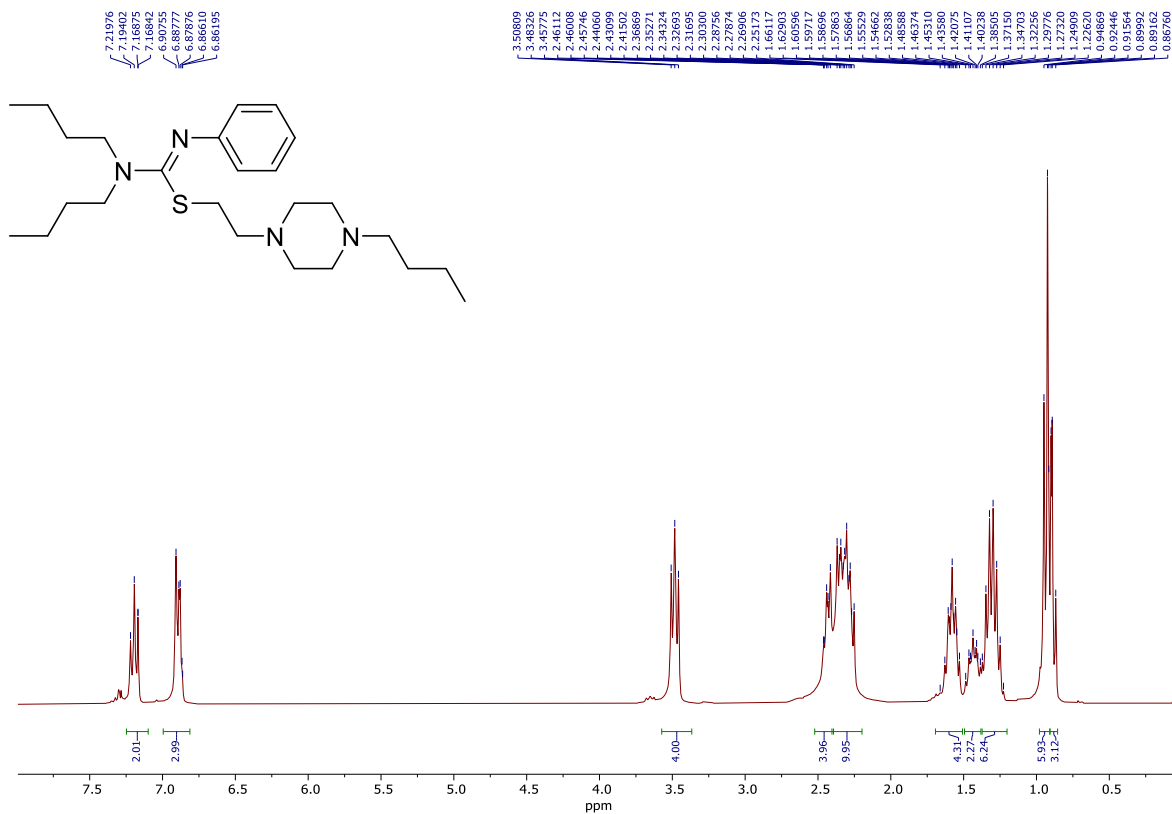

**<sup>1</sup>H NMR (75 MHz, CDCl<sub>3</sub>); 2-(4-Butylpiperazin-1-yl)ethyl (Z)-N,N-dibutyl-N'-phenylcarbamimidothioate **3f****

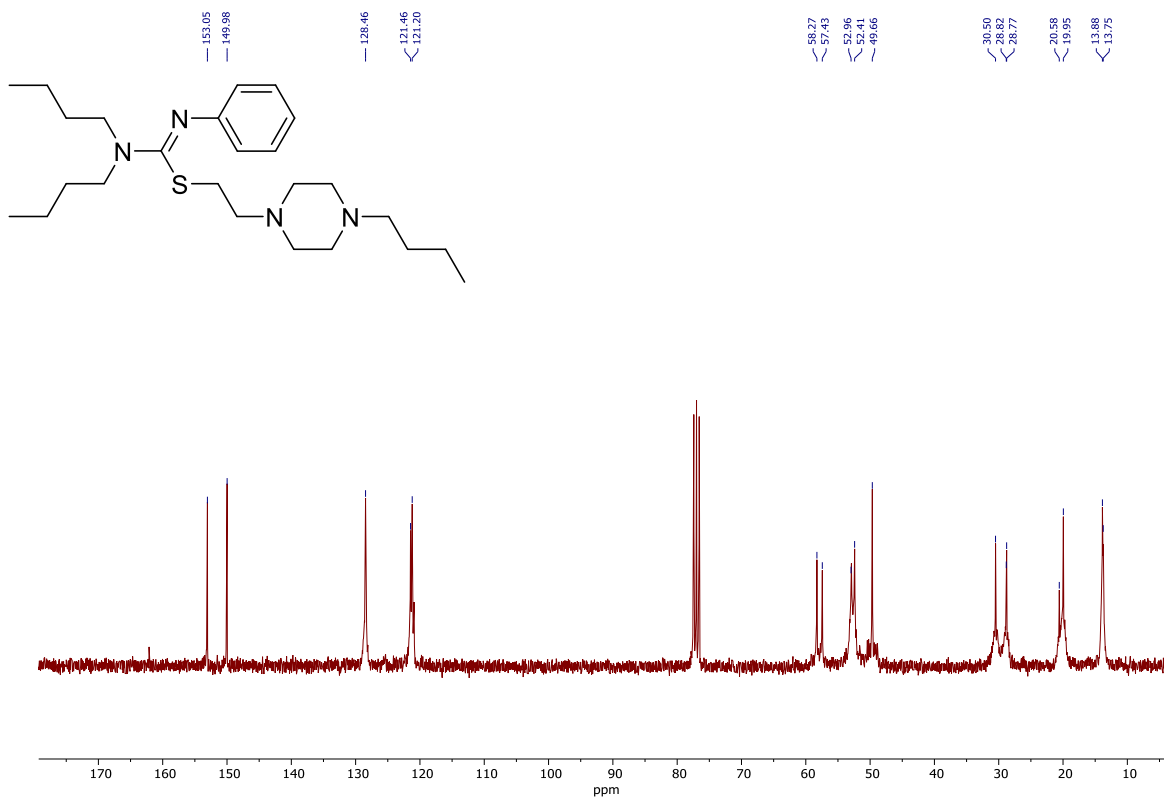

**<sup>13</sup>C NMR (75 MHz, CDCl<sub>3</sub>); 2-(4-Butylpiperazin-1-yl)ethyl (Z)-N,N-dibutyl-N'-phenylcarbamimidothioate **3f****

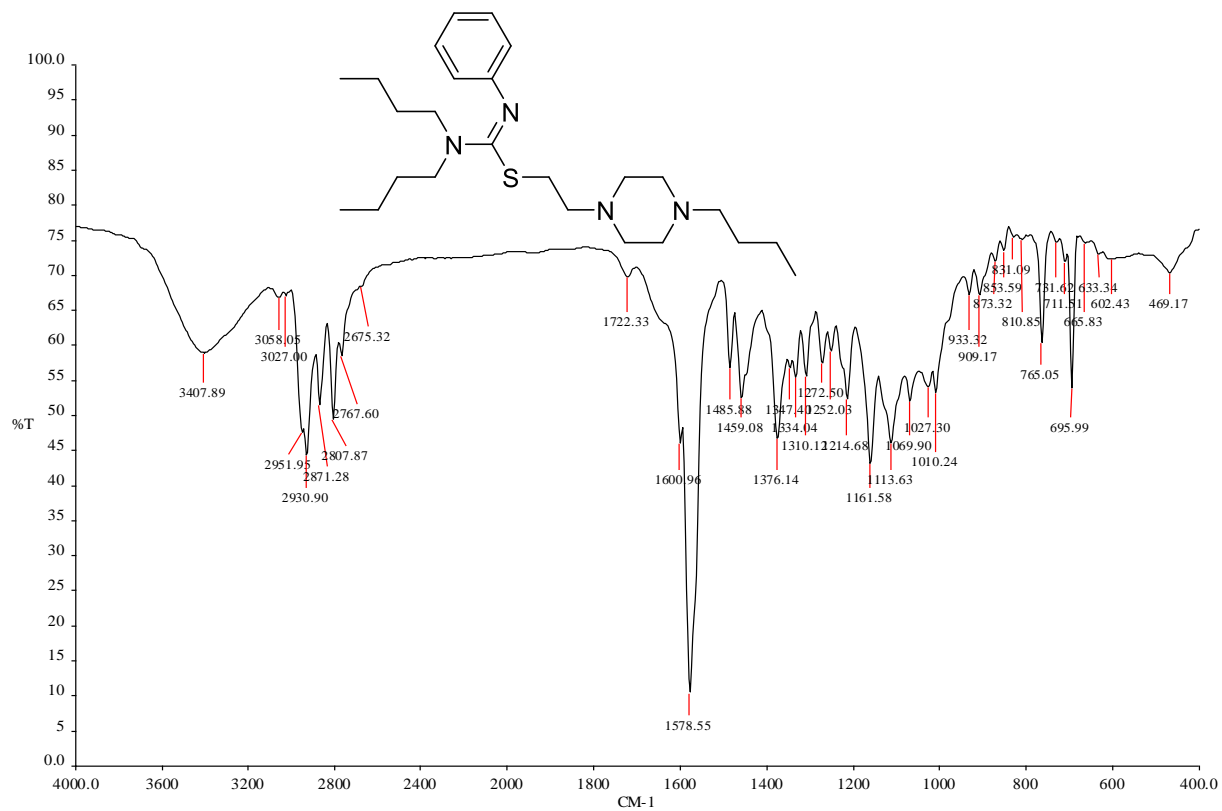

Mr. Moradi

Sample: D 16

Acquired : 3 Jan 2007 6:51 using AcqMethod f1.M  
Instrument : MSD  
Sample Name: D16  
Misc Info :  
Vial Number: 1

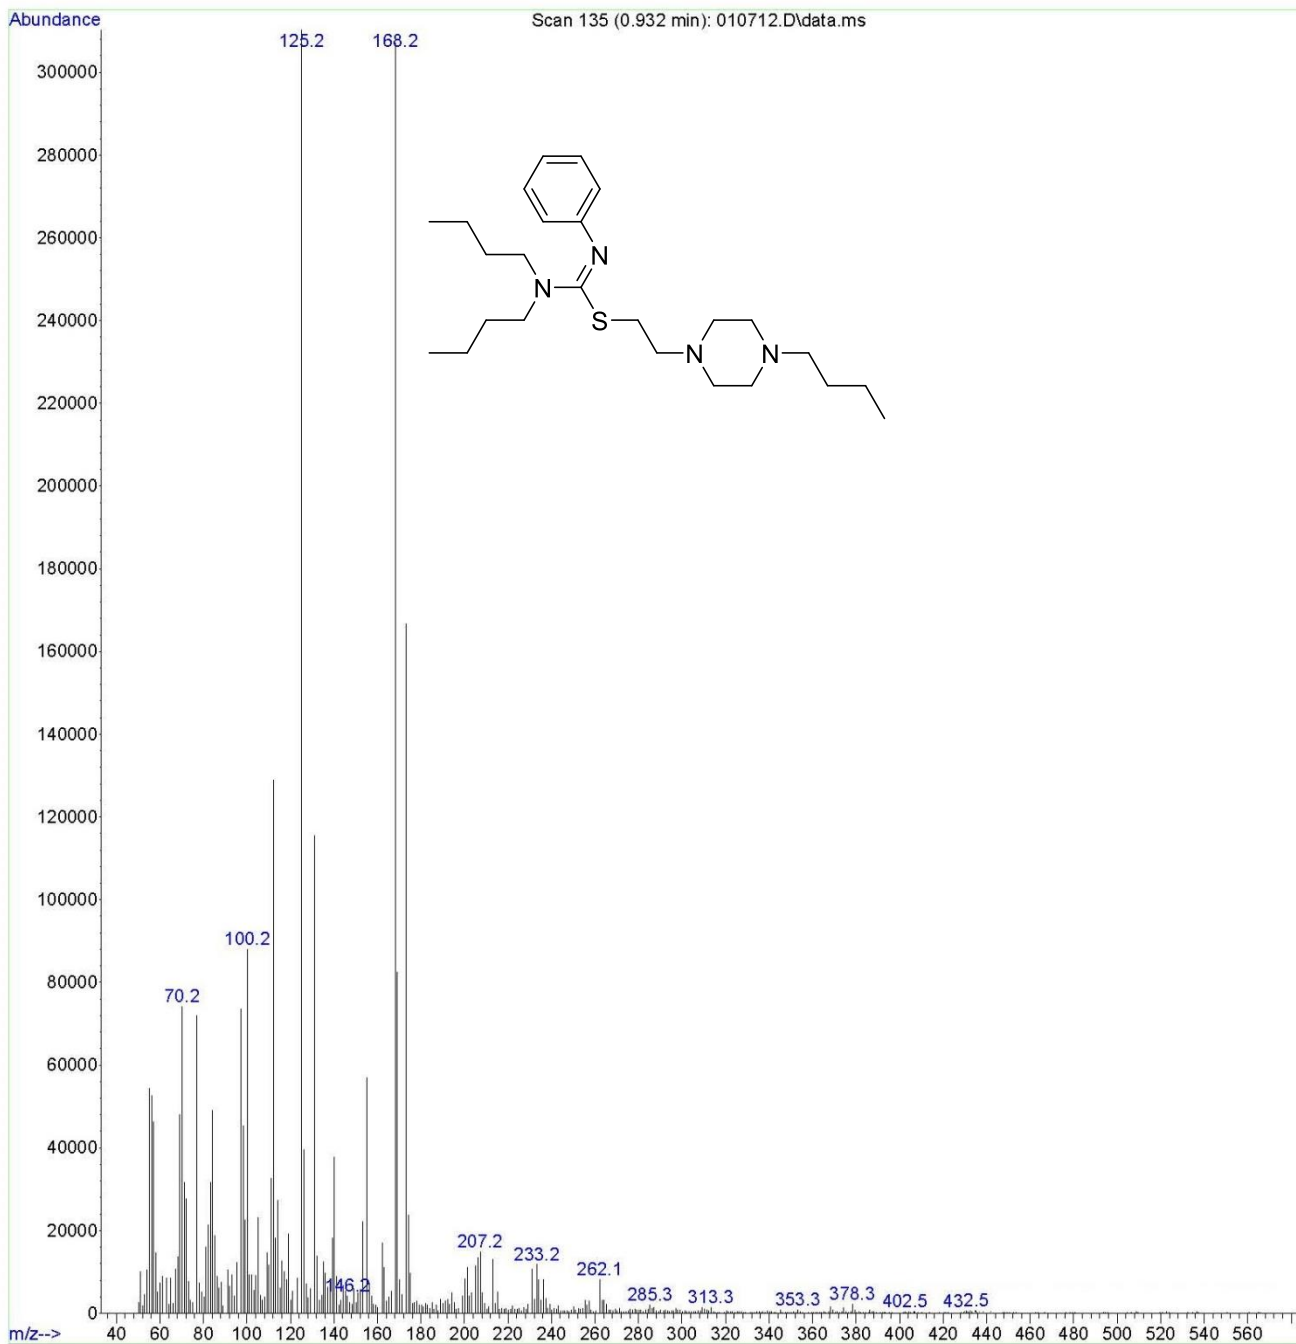

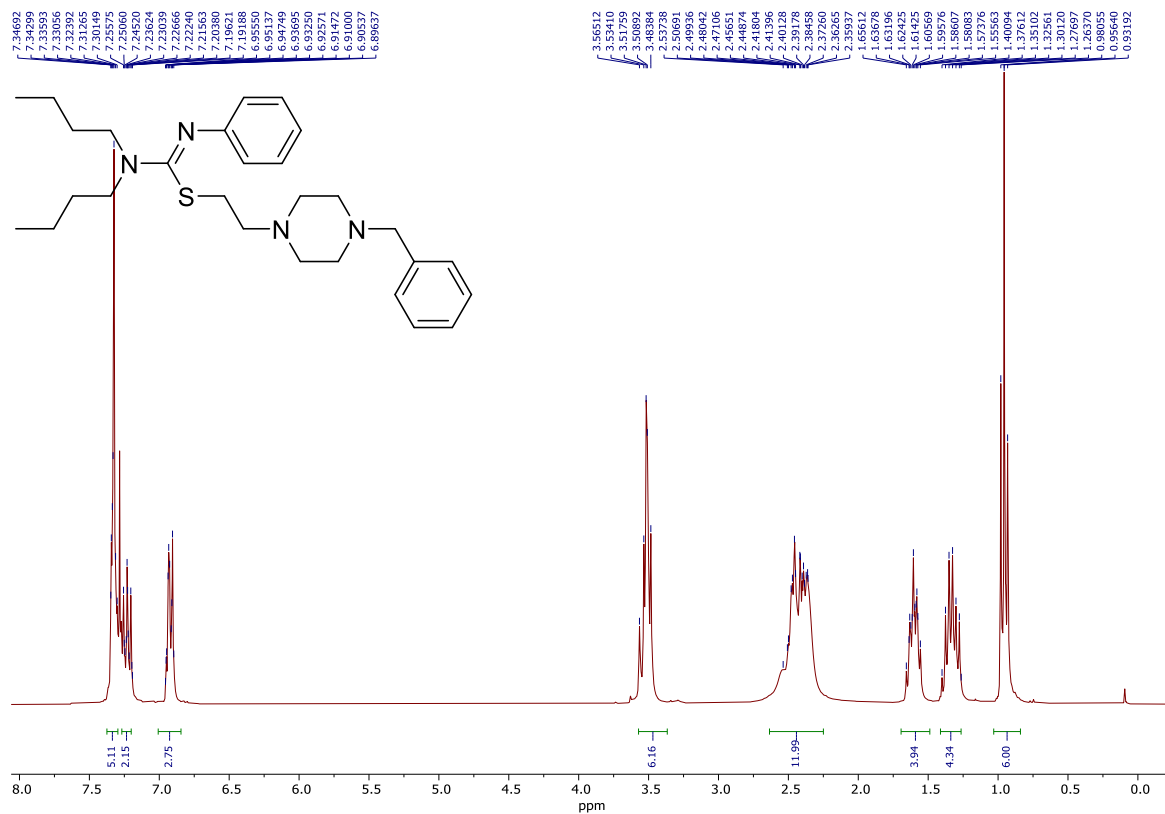

<sup>1</sup>H NMR (300 MHz, CDCl<sub>3</sub>); 2-(4-Benzylpiperazin-1-yl)ethyl (Z)-N,N-dibutyl-N'-phenylcarbamimidothioate **3g**

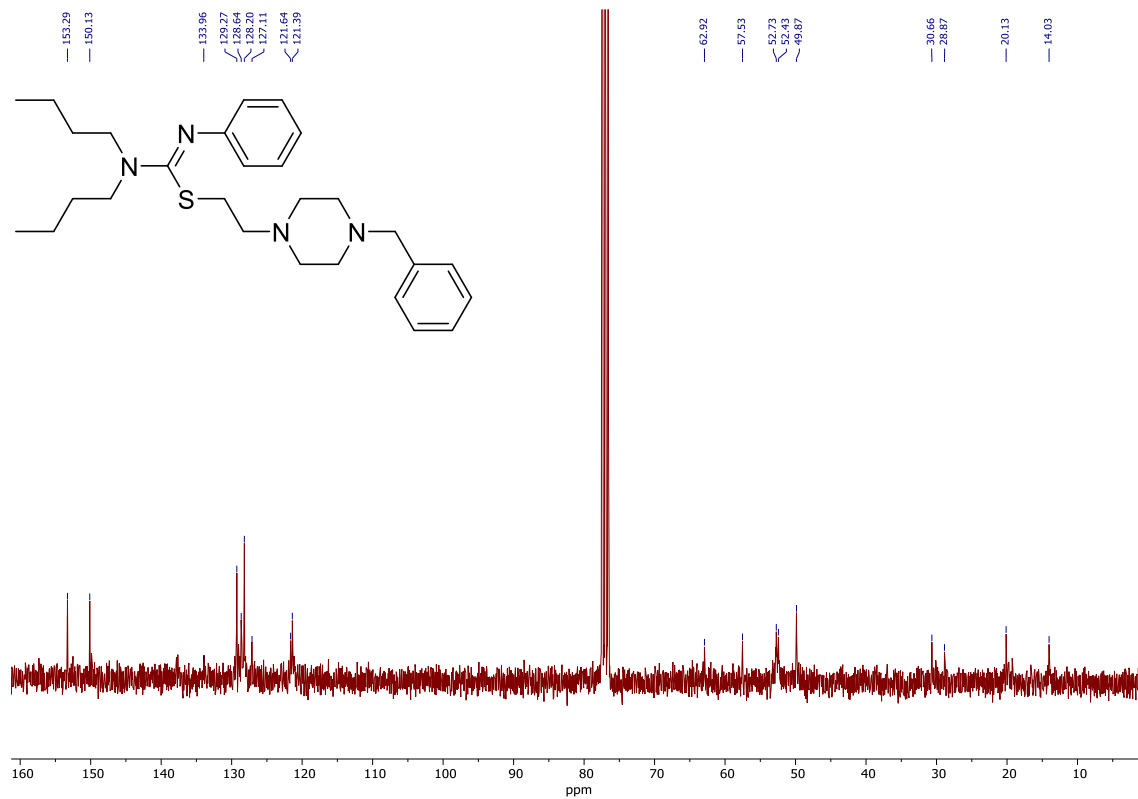

<sup>13</sup>C NMR (75 MHz, CDCl<sub>3</sub>); 2-(4-Benzylpiperazin-1-yl)ethyl (Z)-N,N-dibutyl-N'-phenylcarbamimidothioate **3g**

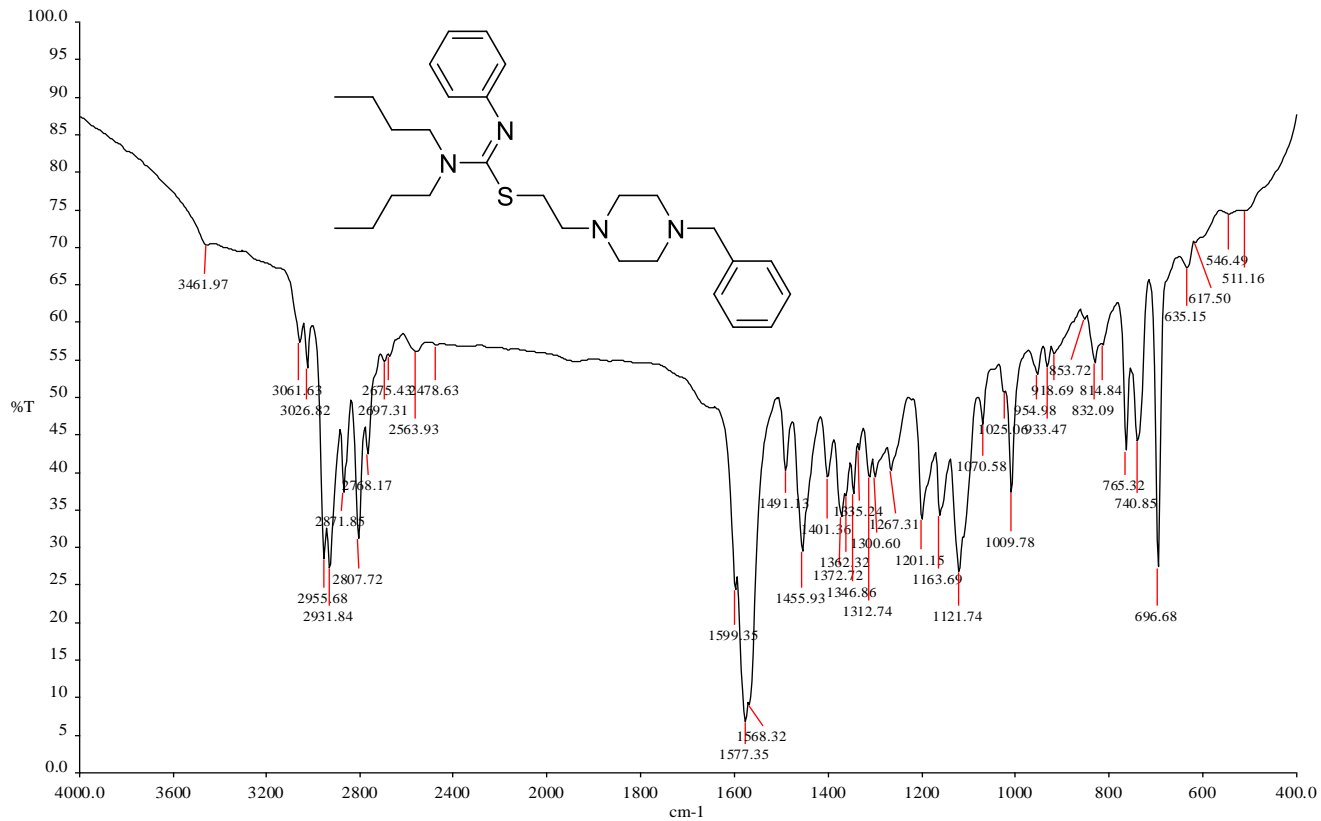

Mr. Moradi

Sample: D 13

Acquired : 3 Jan 2007 7:27 using AcqMethod f1.M  
Instrument : MSD  
Sample Name: D13  
Misc Info :  
Vial Number: 1

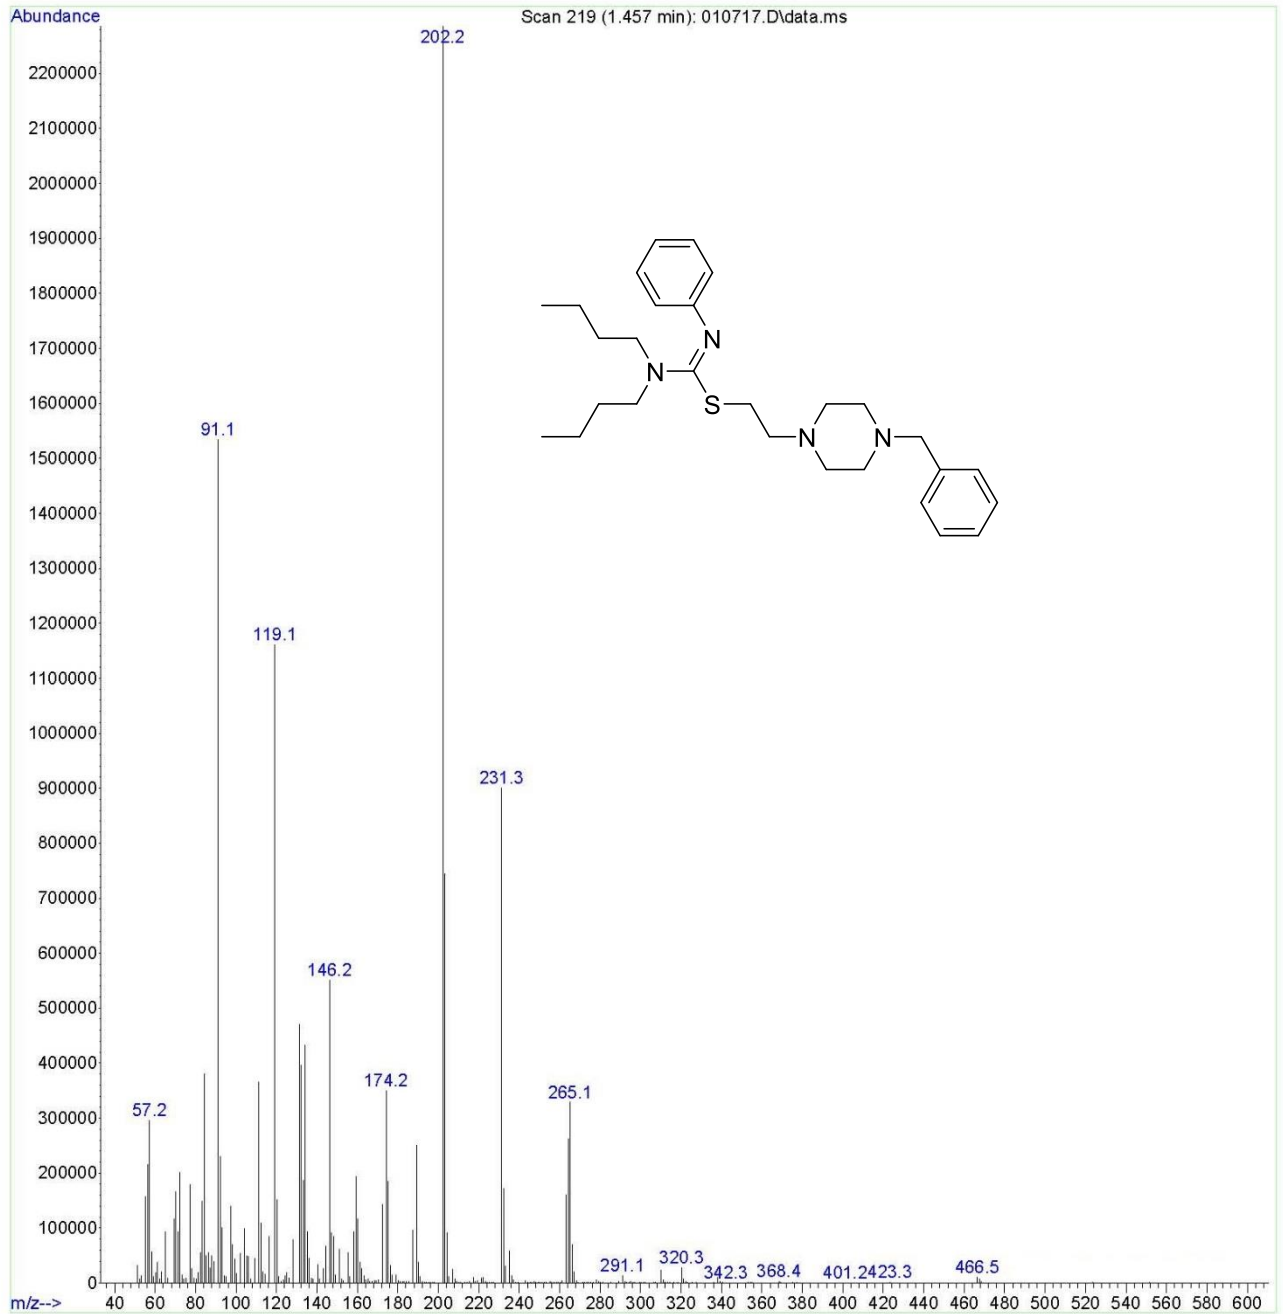

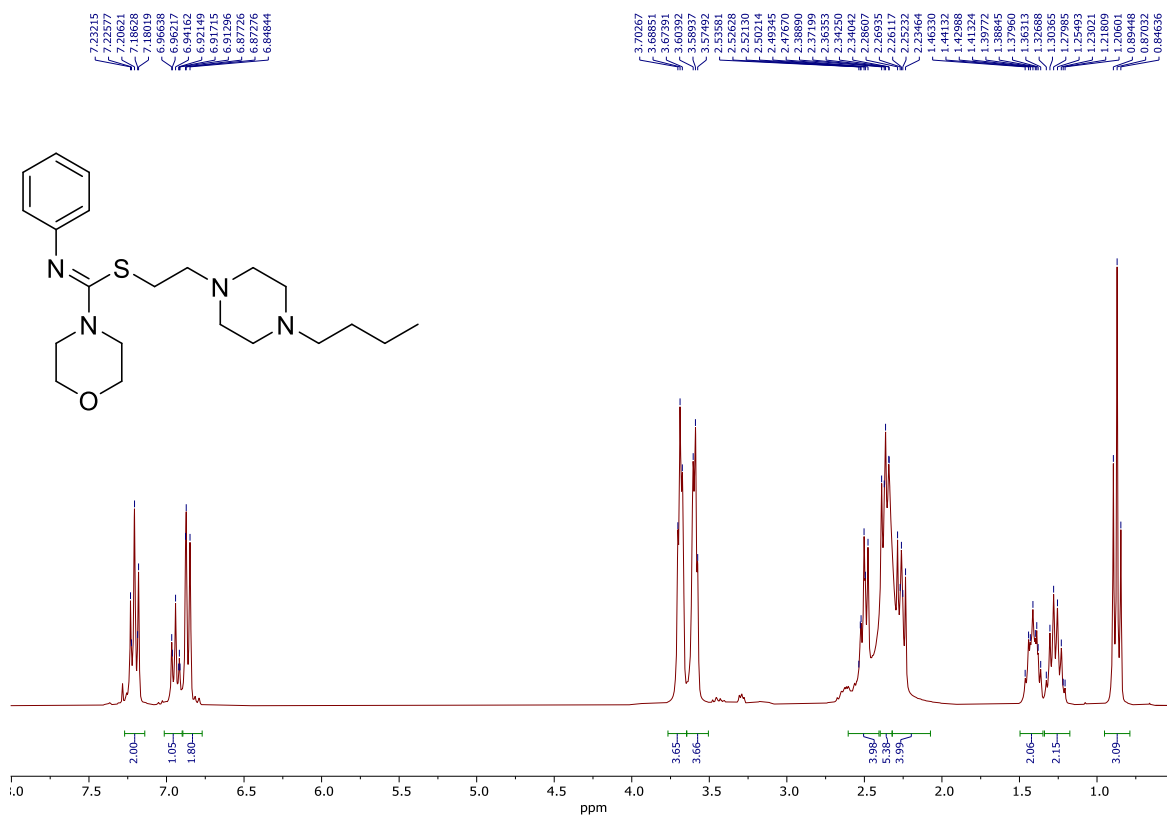

<sup>1</sup>H NMR (300 MHz, CDCl<sub>3</sub>); 2-(4-Butylpiperazin-1-yl)ethyl (Z)-N-phenylmorpholine-4-carbimidothioate **3h**

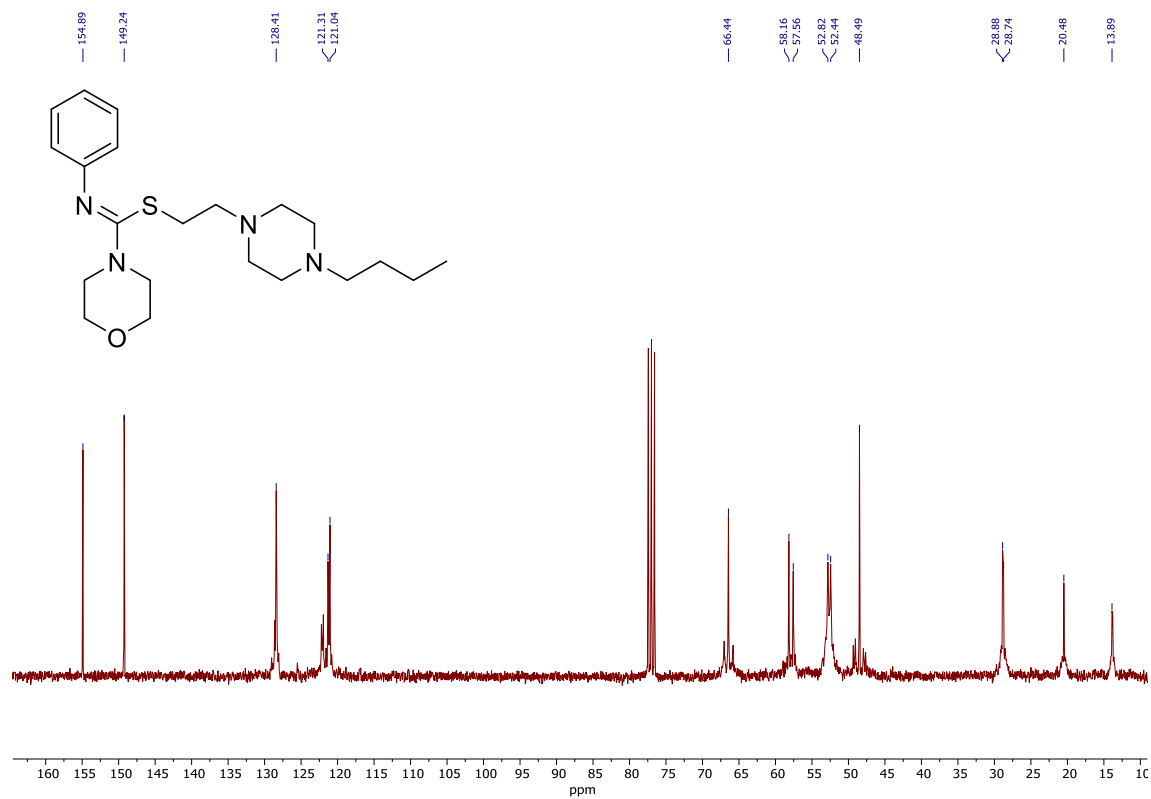

<sup>13</sup>C NMR (75 MHz, CDCl<sub>3</sub>); 2-(4-Butylpiperazin-1-yl)ethyl (Z)-N-phenylmorpholine-4-carbimidothioate **3h**

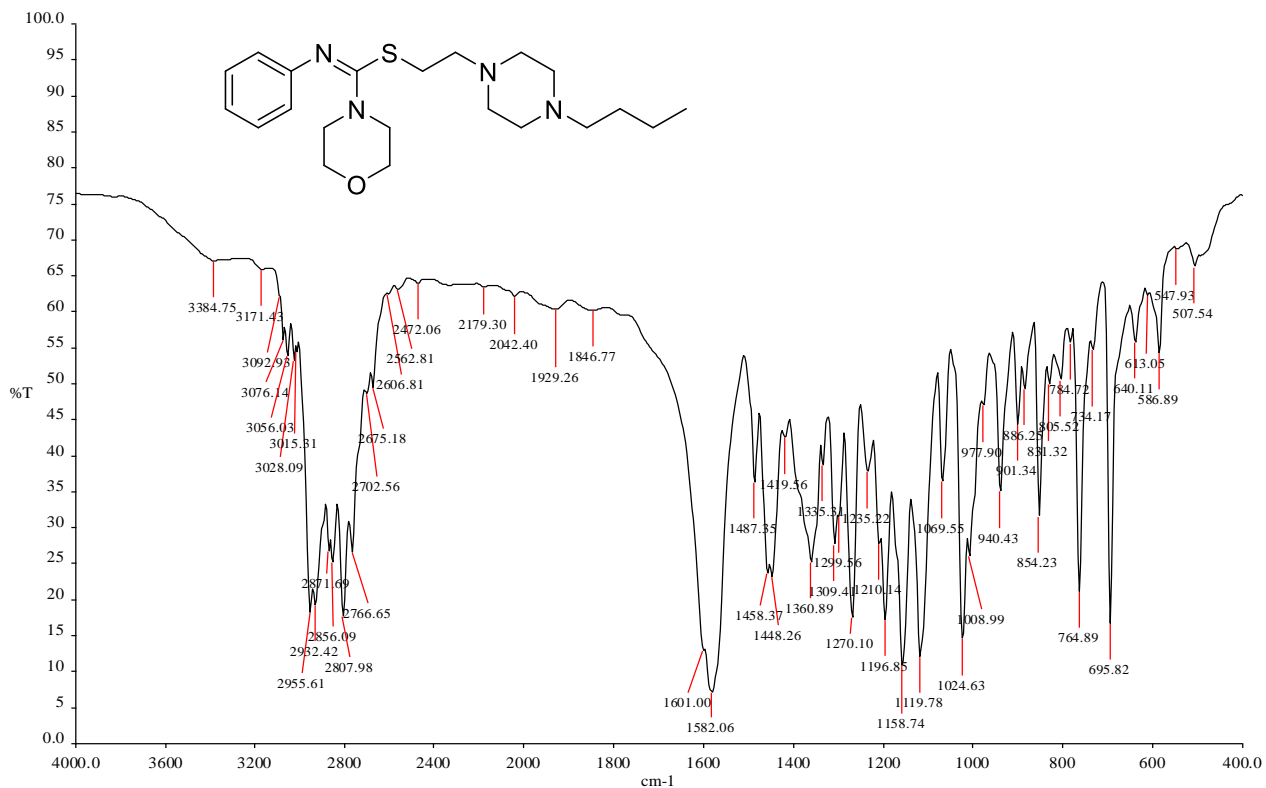

Mr. Moradi

Sample: D 15



Acquired : 3 Jan 2007 7:40 using AcqMethod F1.M  
Instrument : MSD  
Sample Name: D15  
Misc Info :  
Vial Number: 1

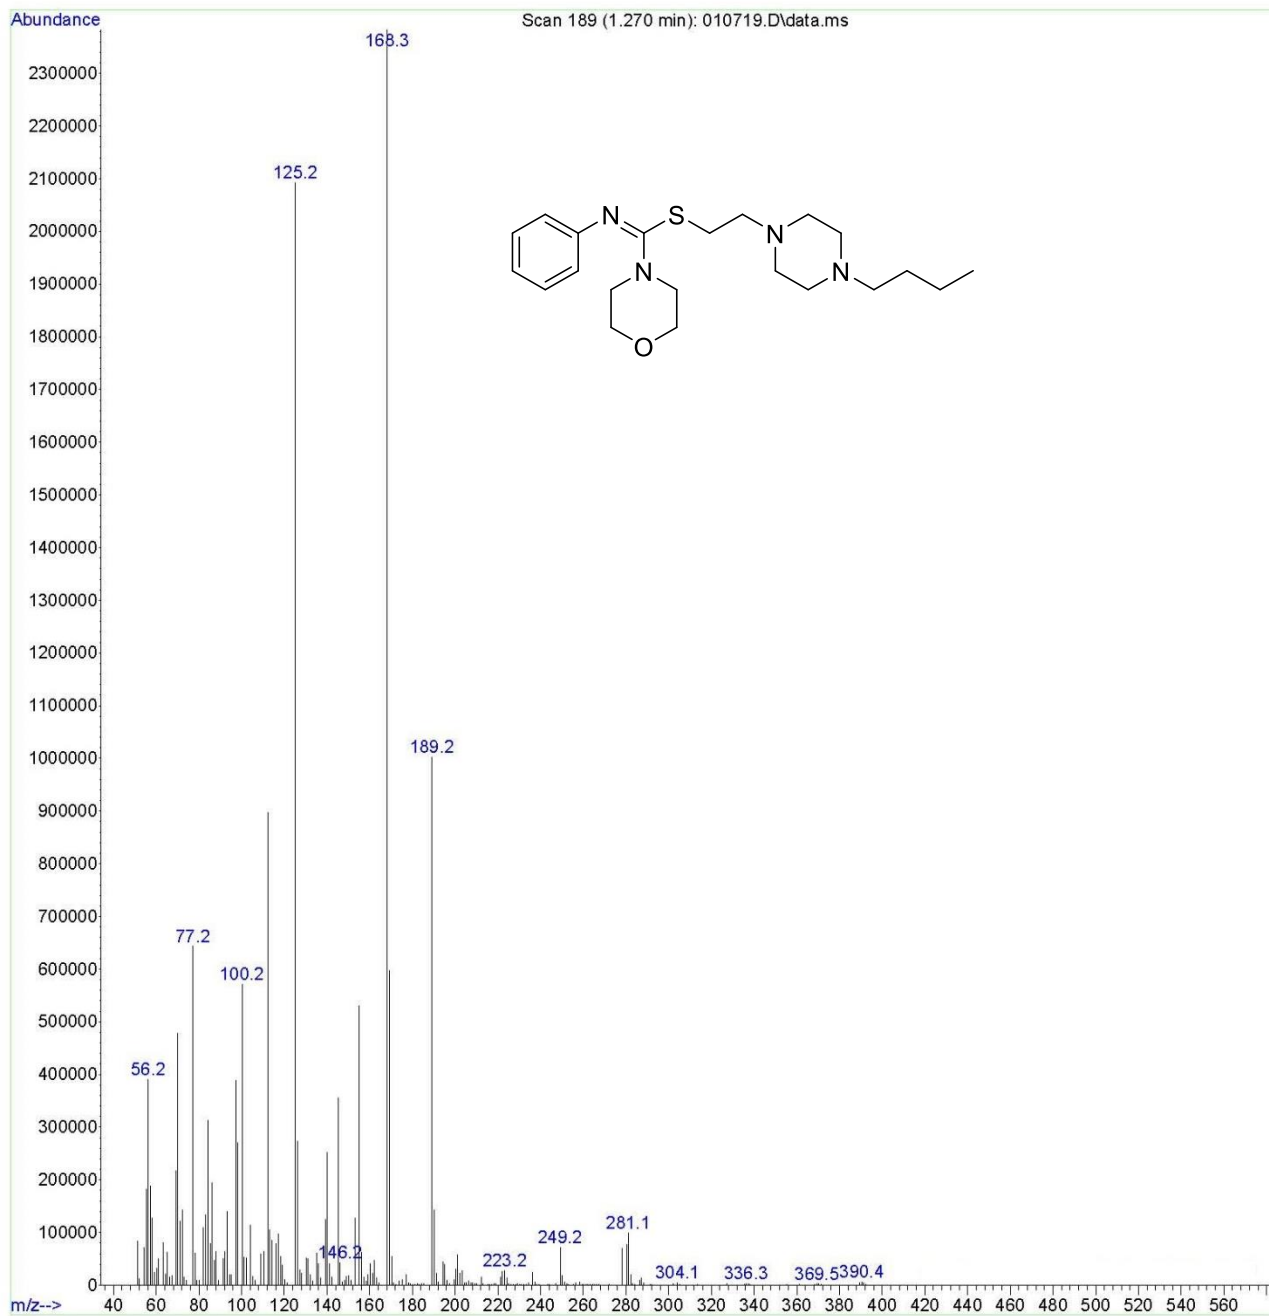

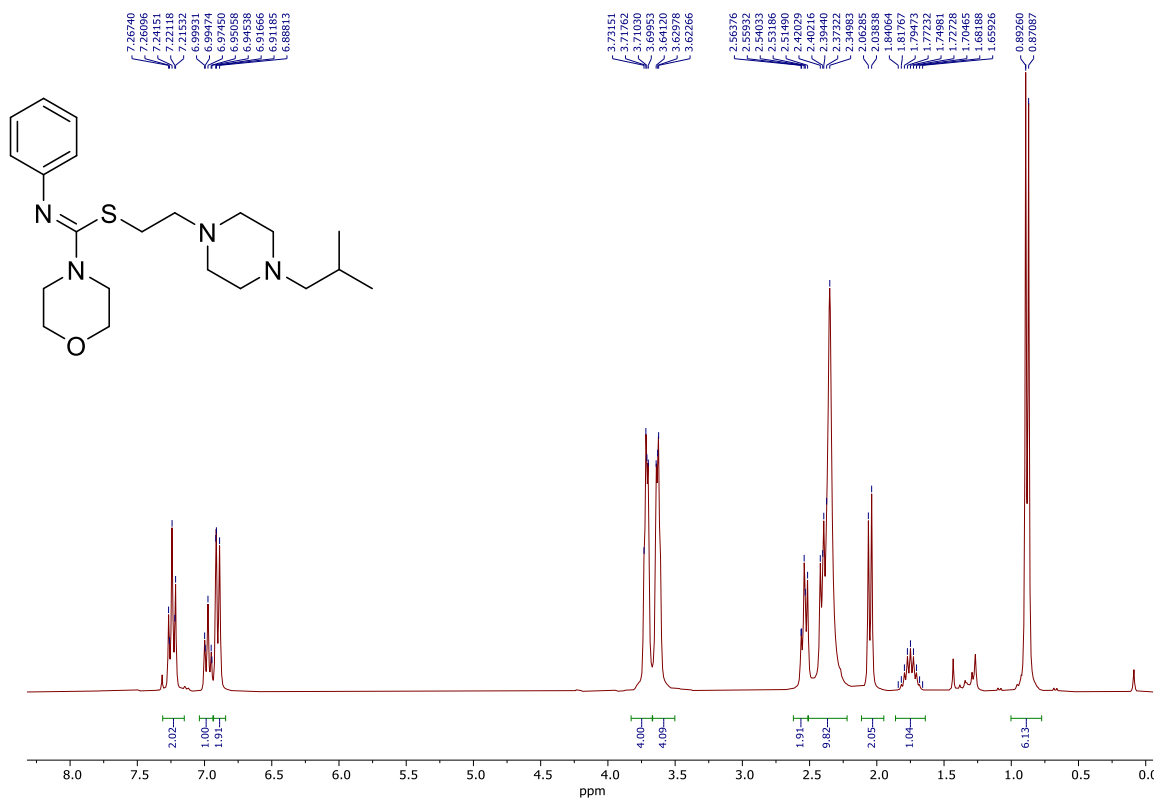

<sup>1</sup>H NMR (300 MHz, CDCl<sub>3</sub>); 2-(4-Isobutylpiperazin-1-yl)ethyl (Z)-N-phenylmorpholine-4-carbimidothioate **3i**

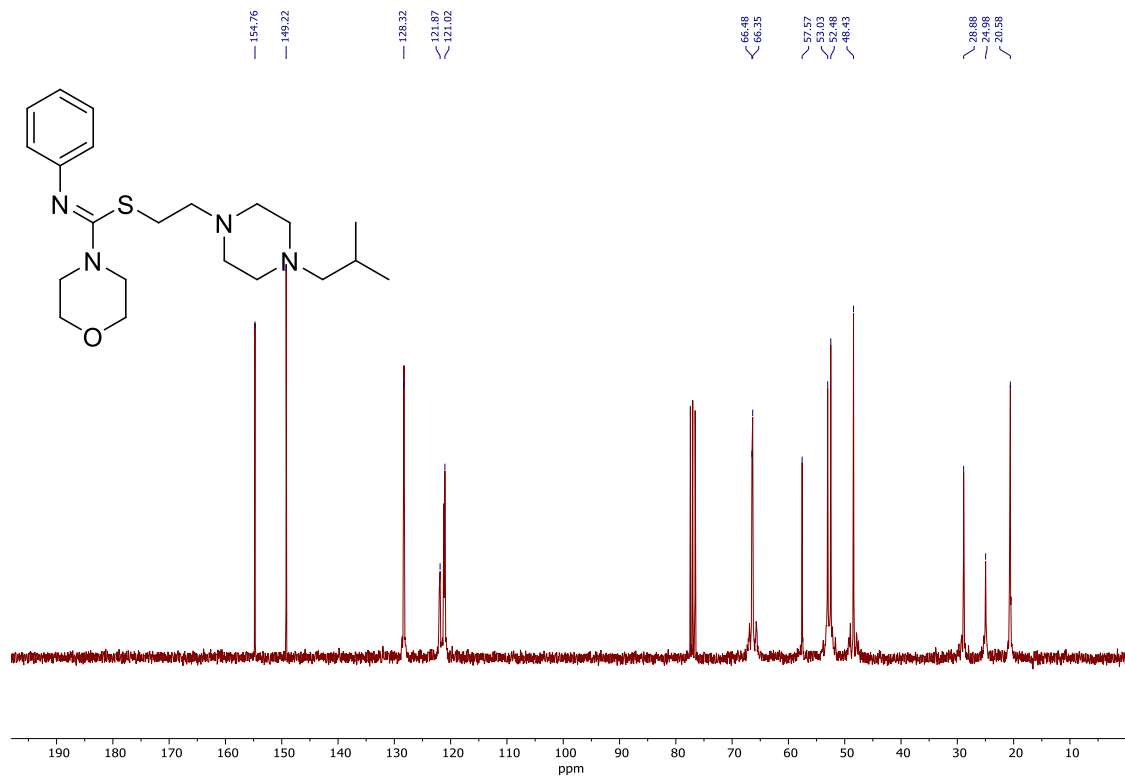

<sup>13</sup>C NMR (75 MHz, CDCl<sub>3</sub>); 2-(4-Isobutylpiperazin-1-yl)ethyl (Z)-N-phenylmorpholine-4-carbimidothioate **3i**

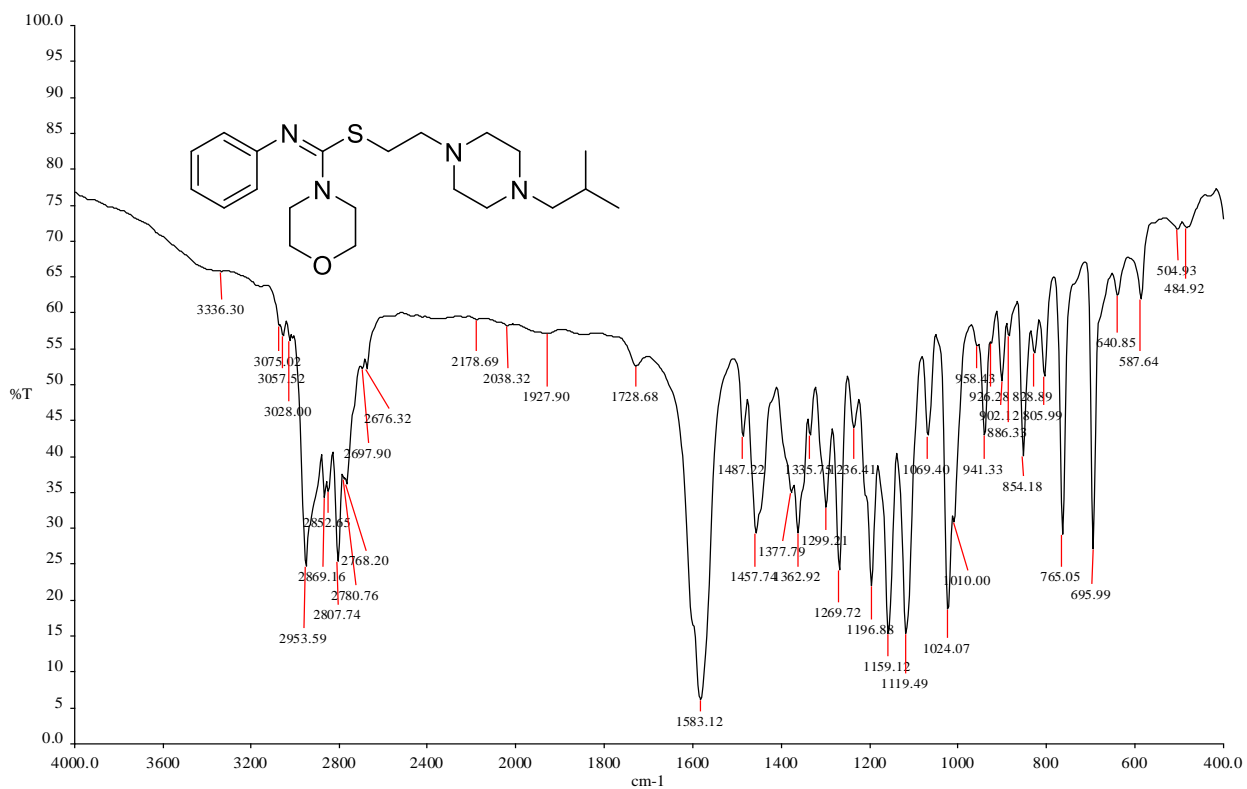

Mr. Moradi

Sample: D 4

Acquired : 3 Jan 2007 7:13 using AcqMethod f1.M  
Instrument : MSD  
Sample Name: D4  
Misc Info :  
Vial Number: 1

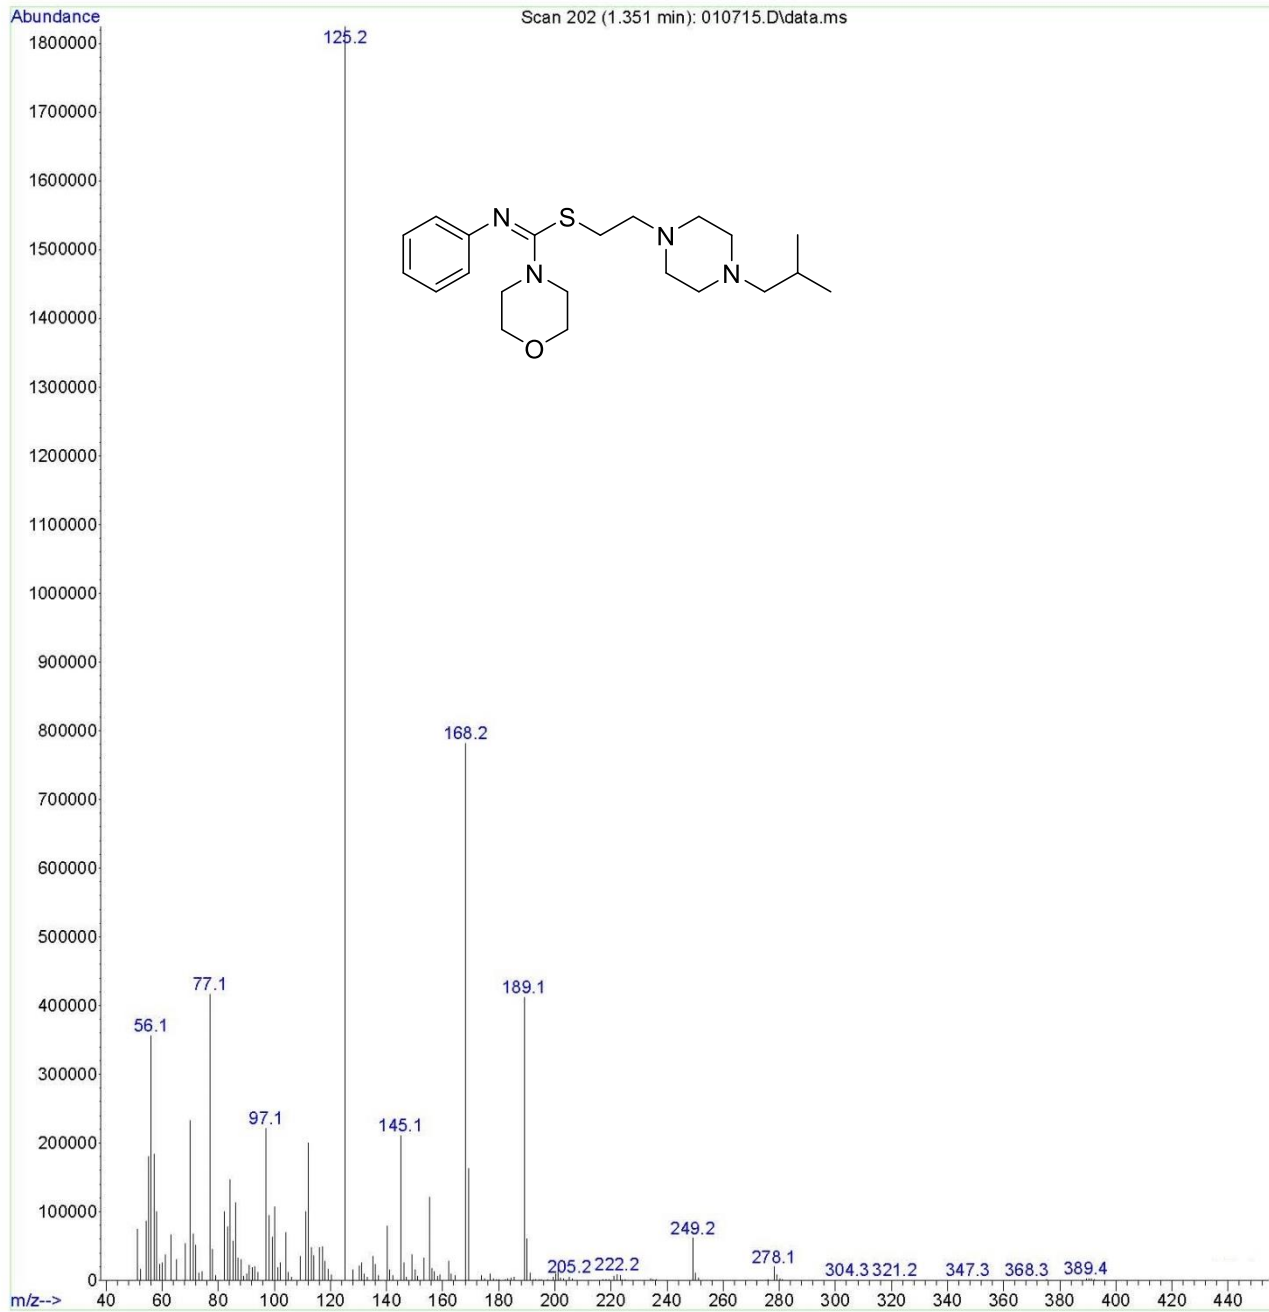

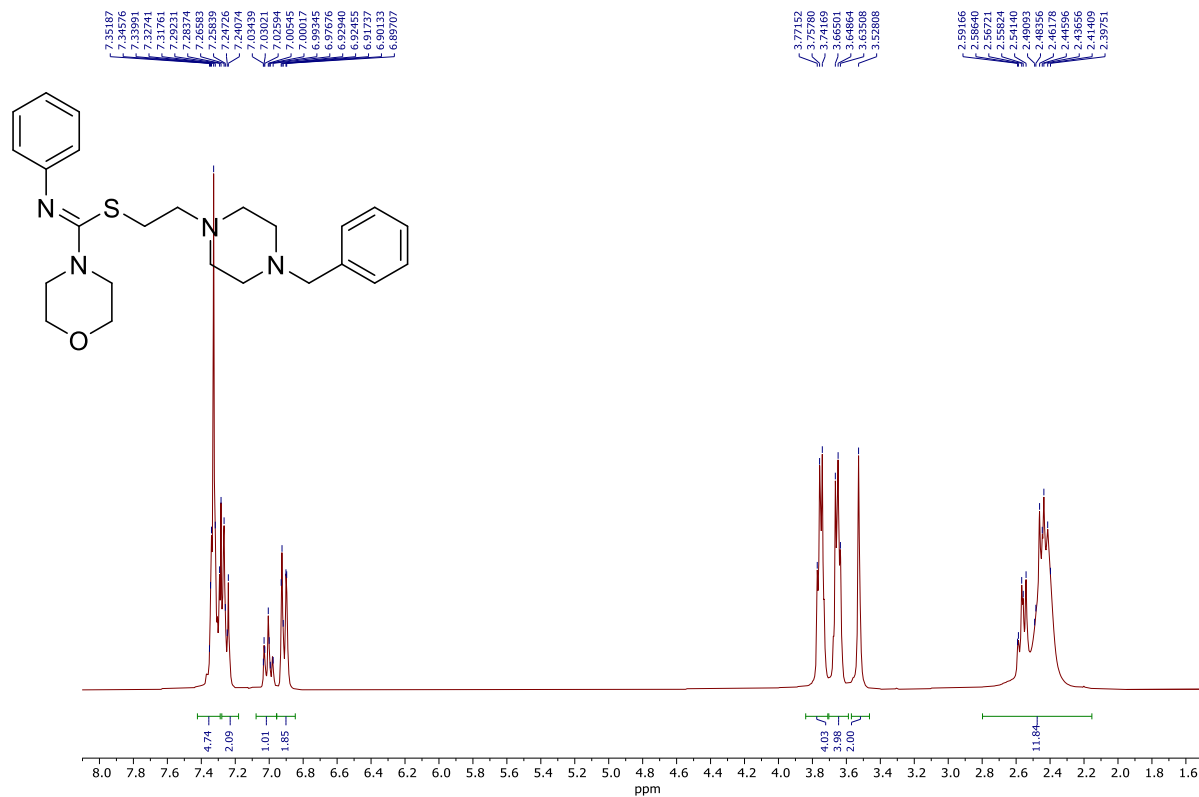

<sup>1</sup>H NMR (75 MHz, CDCl<sub>3</sub>); 2-(4-Benzylpiperazin-1-yl)ethyl (Z)-N-phenylmorpholine-4-carbimidothioate **3j**

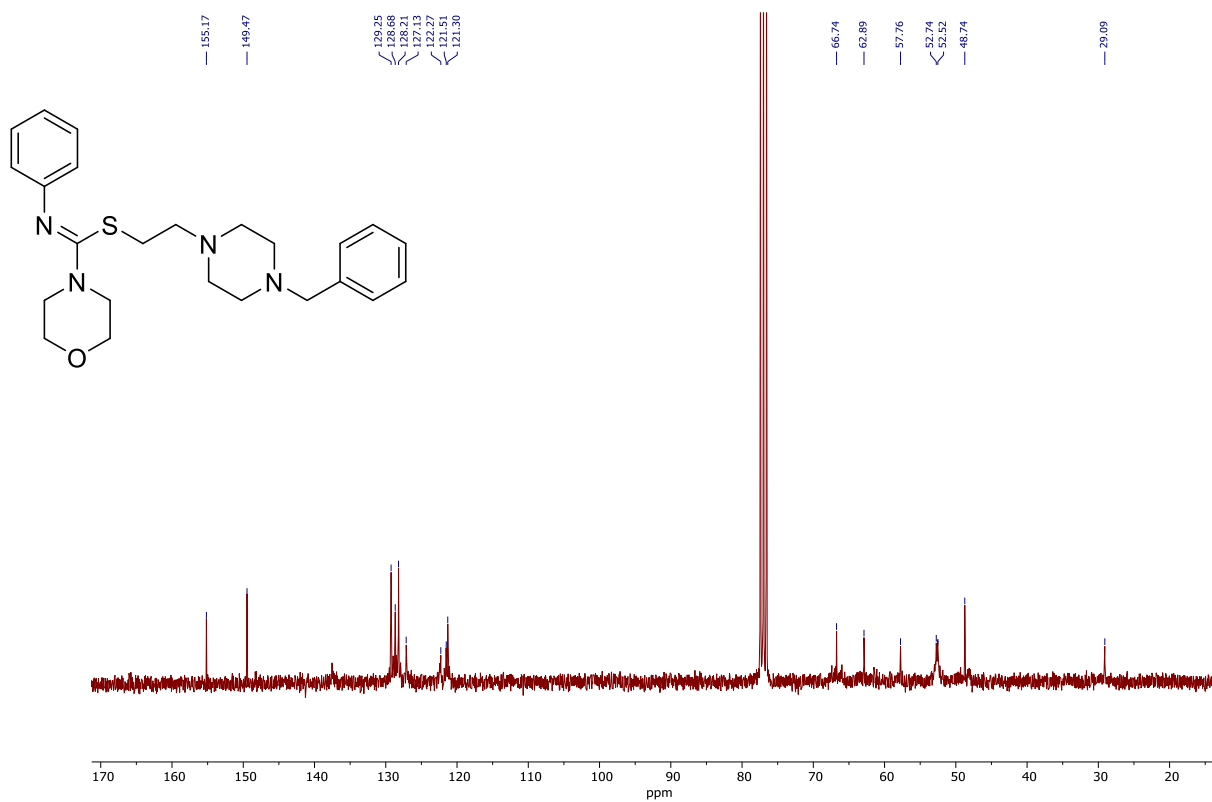

<sup>13</sup>C NMR (75 MHz, CDCl<sub>3</sub>); 2-(4-Benzylpiperazin-1-yl)ethyl (Z)-N-phenylmorpholine-4-carbimidothioate **3j**

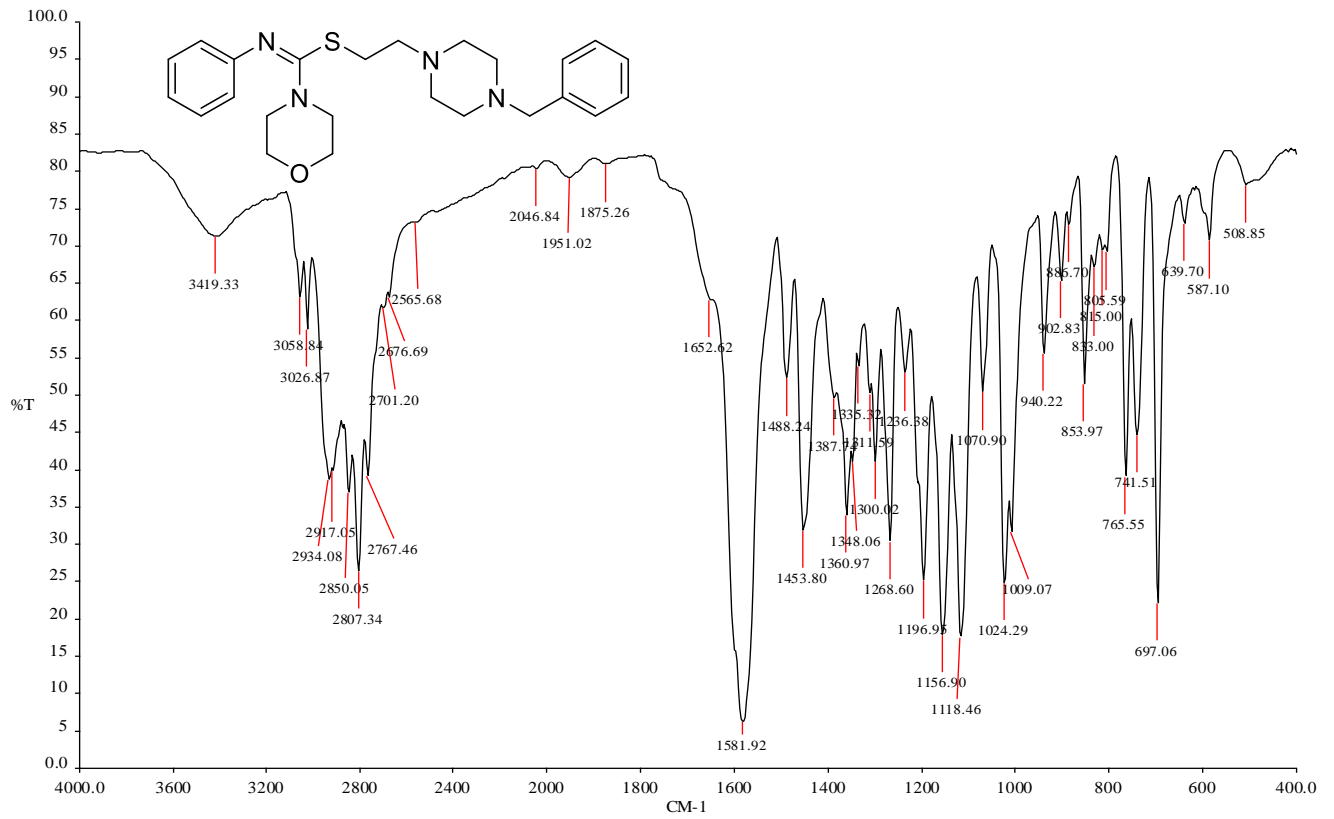

Mr. Moradi

Sample: D 11

Acquired : 3 Jan 2007 7:20 using AcqMethod f1.M  
Instrument : MSD  
Sample Name: D11  
Misc Info :  
Vial Number: 1

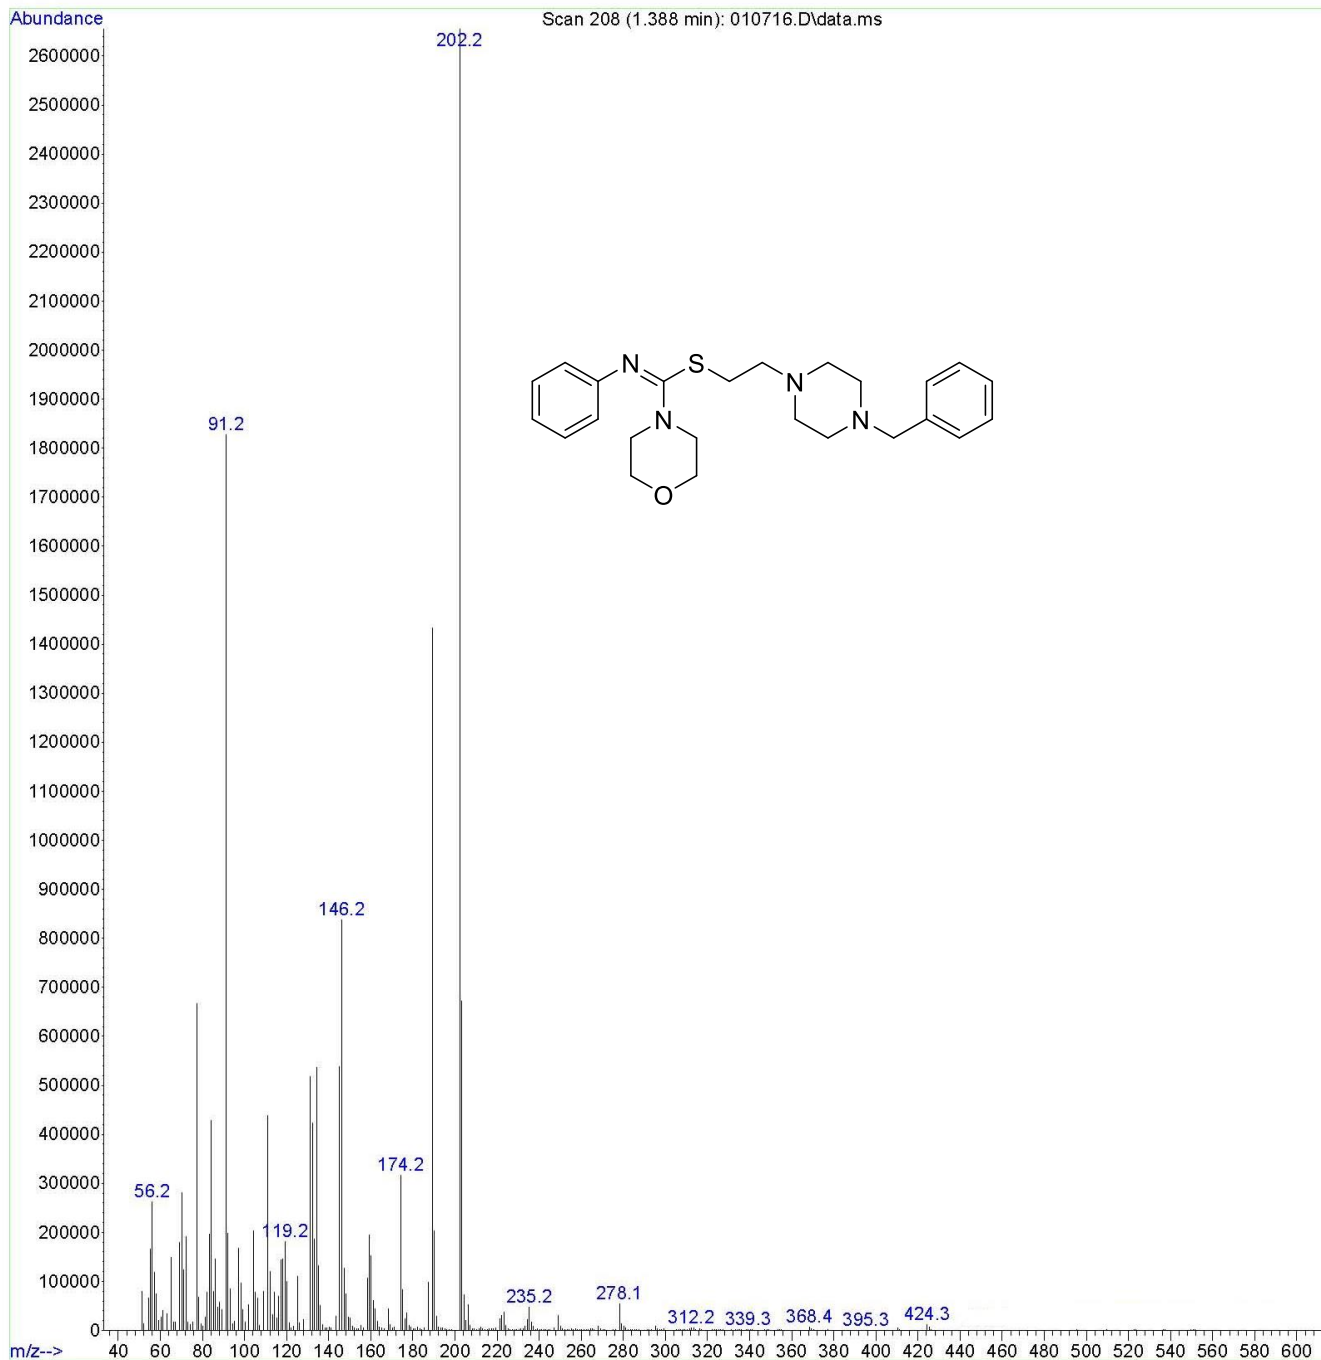

Supplement: d3ra06678a1.pdf [file d3ra06678a1.pdf]
